# Supplementary material for: Synthesis and fluorescence spectroscopy of tris(pyrenyl)pnictogen compounds
Source: Royal Society of Chemistry journal article supplement (doi:10.1039/c7dt01953j), 2017-01-01
Supplement: c7dt01953j1.pdf [file c7dt01953j1.pdf]

## Supporting Information

### Synthesis and Fluorescence Spectroscopy of Tris(pyrenyl) Pnictogen Compounds

Kira Behm, Jeremy B. Essner, Charles L. Barnes, Gary A. Baker, and Justin R. Walensky

Department of Chemistry, University of Missouri, Columbia, MO 65211

#### Table of Contents

|                                                                                                                                                                                                                                                                                                                                                                                                                                                                                                                                                                                                                                                                                                                                           |             |
|-------------------------------------------------------------------------------------------------------------------------------------------------------------------------------------------------------------------------------------------------------------------------------------------------------------------------------------------------------------------------------------------------------------------------------------------------------------------------------------------------------------------------------------------------------------------------------------------------------------------------------------------------------------------------------------------------------------------------------------------|-------------|
| <b>Table S1.</b> Calculated solution concentrations and excitation/emission wavelengths monitored.....                                                                                                                                                                                                                                                                                                                                                                                                                                                                                                                                                                                                                                    | 2           |
| <b>Table S2.</b> Extinction coefficients at the indicated wavelengths.....                                                                                                                                                                                                                                                                                                                                                                                                                                                                                                                                                                                                                                                                | 2           |
| <b>Table S3.</b> Reference fluorophore used to determine quantum yield ( $\Phi$ ) values.....                                                                                                                                                                                                                                                                                                                                                                                                                                                                                                                                                                                                                                             | 2           |
| <b>Figure S1.</b> (A–E) Images of pyrene (Py; 12.5 $\mu$ M) and the indicated compounds ( $\sim$ 11 $\mu$ M) showing their fluorescence emission under UV excitation (325 nm) using a He-Cd laser (illumination occurs from the left side). Panels A and B are of the same three compounds with the 2 <sup>nd</sup> and 4 <sup>th</sup> vials reversed to better show the fluorescence of SP(Py) <sub>3</sub> . The same is the case for panels D and E to better illustrate the fluorescence of Sb(Py) <sub>3</sub> .....                                                                                                                                                                                                                | 3           |
| <b>Figure S2.</b> Normalized (A) absorbance and steady-state (B) emission and (C) excitation spectra of pyrene (12.5 $\mu$ M) dissolved in methanol, monitored at the wavelengths indicated within the legends of (B) and (C). The emission and excitation spectra were normalized to the highest energy emission peak.....                                                                                                                                                                                                                                                                                                                                                                                                               | 4           |
| <b>Figure S3.</b> Normalized (A) absorbance and steady-state (B) emission and (C) excitation spectra of Sb(Py) <sub>3</sub> (10.9 $\mu$ M) dissolved in DCM. The absorbance of free pyrene (12.5 $\mu$ M in MeOH) is also provided in panel A as a benchmark. The emission and excitation spectra were monitored at the wavelengths indicated within the legends of (B) and (C), normalizing to the highest energy emission peak. The quantum yield, calculated at 350 nm excitation, was found to be 0.14%.....                                                                                                                                                                                                                          | 5           |
| <b>Figure S4.</b> Normalized (A) absorbance and steady-state (B) emission and (C) excitation spectra of Bi(Py) <sub>3</sub> (10.9 $\mu$ M) dissolved in DCM. The absorbance of free pyrene (12.5 $\mu$ M in MeOH) is also provided in panel A as a benchmark. The emission and excitation spectra were monitored at the wavelengths indicated within the legends of (B) and (C), normalizing to the highest energy emission peak. The quantum yield, calculated at 350 nm excitation, was found to be 0.44%.....                                                                                                                                                                                                                          | 6           |
| <b>Figure S5.</b> Absorbance (left y-axis) and normalized steady-state emission and excitation (right y-axis) spectra of (A) P(Py) <sub>3</sub> , (B) OP(Py) <sub>3</sub> , (C) SP(Py) <sub>3</sub> , (D) As(Py) <sub>3</sub> , (E) OAs(Py) <sub>3</sub> , (F) Sb(Py) <sub>3</sub> , and (G) Bi(Py) <sub>3</sub> compared to the spectra of pyrene. All emission spectra were monitored under 333 nm excitation while the excitation spectra were monitored at the emission band nearest to 400 nm (the exact wavelengths monitored are indicated within the legends). All fluorescence spectra were normalized to the highest energy emission peak. The quantum yields of each compound are indicated within their respective panel..... | 7           |
| <b>NMR Spectra for compounds 1-7.....</b>                                                                                                                                                                                                                                                                                                                                                                                                                                                                                                                                                                                                                                                                                                 | <b>8-26</b> |

**Table S1.** Calculated solution concentrations and excitation/emission wavelengths monitored.

| Compound             | Concentration ( $\mu\text{M}$ ) | Excitation Wavelengths (nm) | Emission Wavelengths (nm) |
|----------------------|---------------------------------|-----------------------------|---------------------------|
| Py                   | 12.5                            | 325, 333                    | 373, 379, 384, 393, 410   |
| P(Py) <sub>3</sub>   | 10.5                            | 325, 333, 350, 375          | 381, 400, 422, 450, 500   |
| OP(Py) <sub>3</sub>  | 11.2                            | Same as above               | Same as above             |
| SP(Py) <sub>3</sub>  | 10.2                            | 325, 333, 350               | 381, 400, 434, 450, 500   |
| As(Py) <sub>3</sub>  | 11.0                            | 325, 333, 350, 375          | 380, 399, 422, 450, 500   |
| OAs(Py) <sub>3</sub> | 11.0                            | Same as above               | 379, 399, 419, 487, 525   |
| Sb(Py) <sub>3</sub>  | 10.9                            | 325, 333, 350               | 385, 406, 434, 450        |
| Bi(Py) <sub>3</sub>  | 10.9                            | 325, 333, 350, 375, 400     | 385, 406, 430, 450, 500   |

**Table S2.** Extinction coefficients at the indicated wavelengths.

| Compound             | $\lambda$ (nm) | $\epsilon$ ( $\text{M}^{-1}\text{cm}^{-1}$ ) | $\lambda$ (nm) | $\epsilon$ ( $\text{M}^{-1}\text{cm}^{-1}$ ) |
|----------------------|----------------|----------------------------------------------|----------------|----------------------------------------------|
| Py                   | 320            | 22948                                        | 335            | 38949                                        |
| P(Py) <sub>3</sub>   | 348            | 57684                                        | 364            | 67767                                        |
| OP(Py) <sub>3</sub>  | 347            | 74806                                        | 363            | 101857                                       |
| SP(Py) <sub>3</sub>  | 353            | 64560                                        | 367            | 71591                                        |
| As(Py) <sub>3</sub>  | 344            | 57214                                        | 361            | 73108                                        |
| OAs(Py) <sub>3</sub> | 344            | 45495                                        | 360            | 64822                                        |
| Sb(Py) <sub>3</sub>  | 342            | 77078                                        | 360            | 117110                                       |
| Bi(Py) <sub>3</sub>  | 338            | 84570                                        | 356            | 132628                                       |

**Table S3.** Reference fluorophore used to determine quantum yield ( $\Phi$ ) values.

| Fluorophore     | Excitation Wavelength (nm) | Solvent                              | $n^a$ | $\Phi$ (%) | Ref.         |
|-----------------|----------------------------|--------------------------------------|-------|------------|--------------|
| Quinine sulfate | 350                        | 0.1 M H <sub>2</sub> SO <sub>4</sub> | 1.343 | 57.7       | <sup>1</sup> |

<sup>a</sup> refractive index.

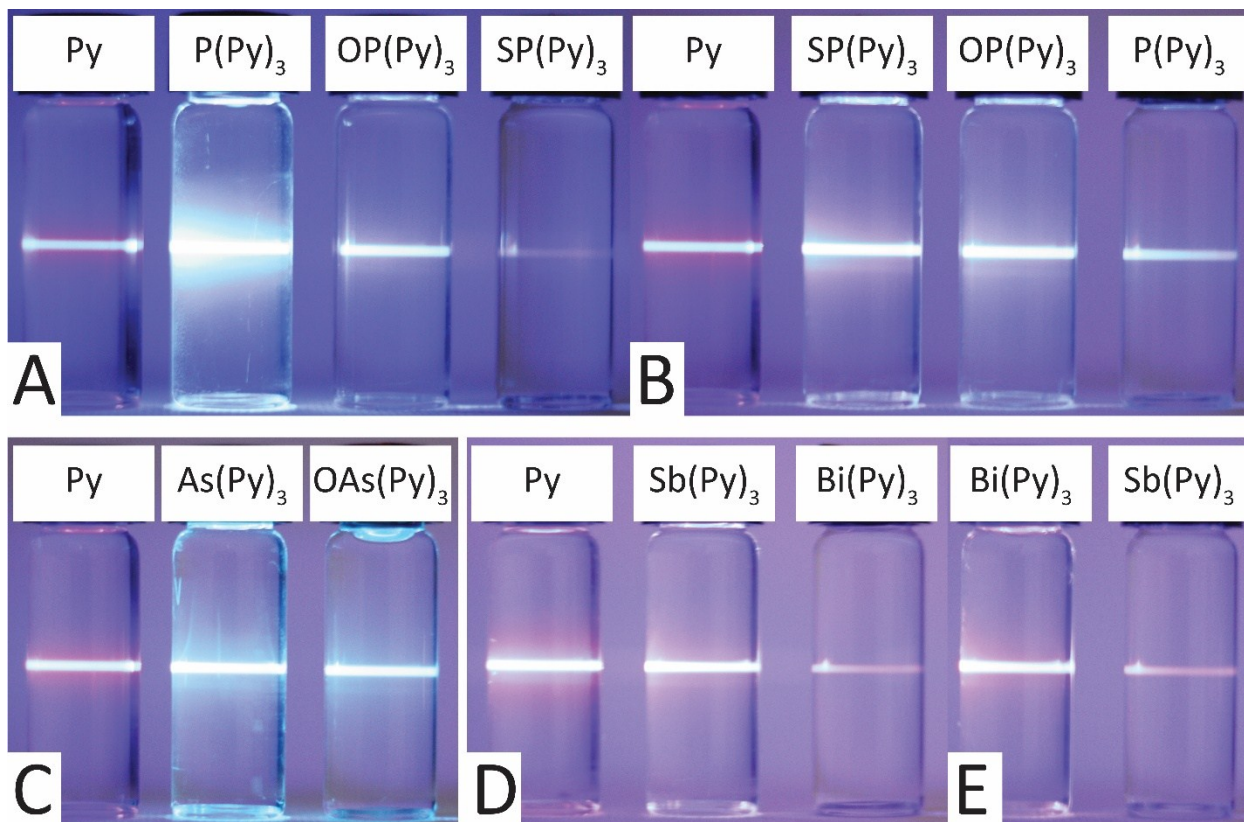

**Figure S1.** (A–E) Images of pyrene (Py; 12.5  $\mu\text{M}$ ) and the indicated compounds ( $\sim 11 \mu\text{M}$ ) showing their fluorescence emission under UV excitation (325 nm) using a He-Cd laser (illumination occurs from the left side). Panels A and B are of the same three compounds with the 2<sup>nd</sup> and 4<sup>th</sup> vials reversed to better show the fluorescence of SP(Py)<sub>3</sub>. The same is the case for panels D and E to better illustrate the fluorescence of Sb(Py)<sub>3</sub>.

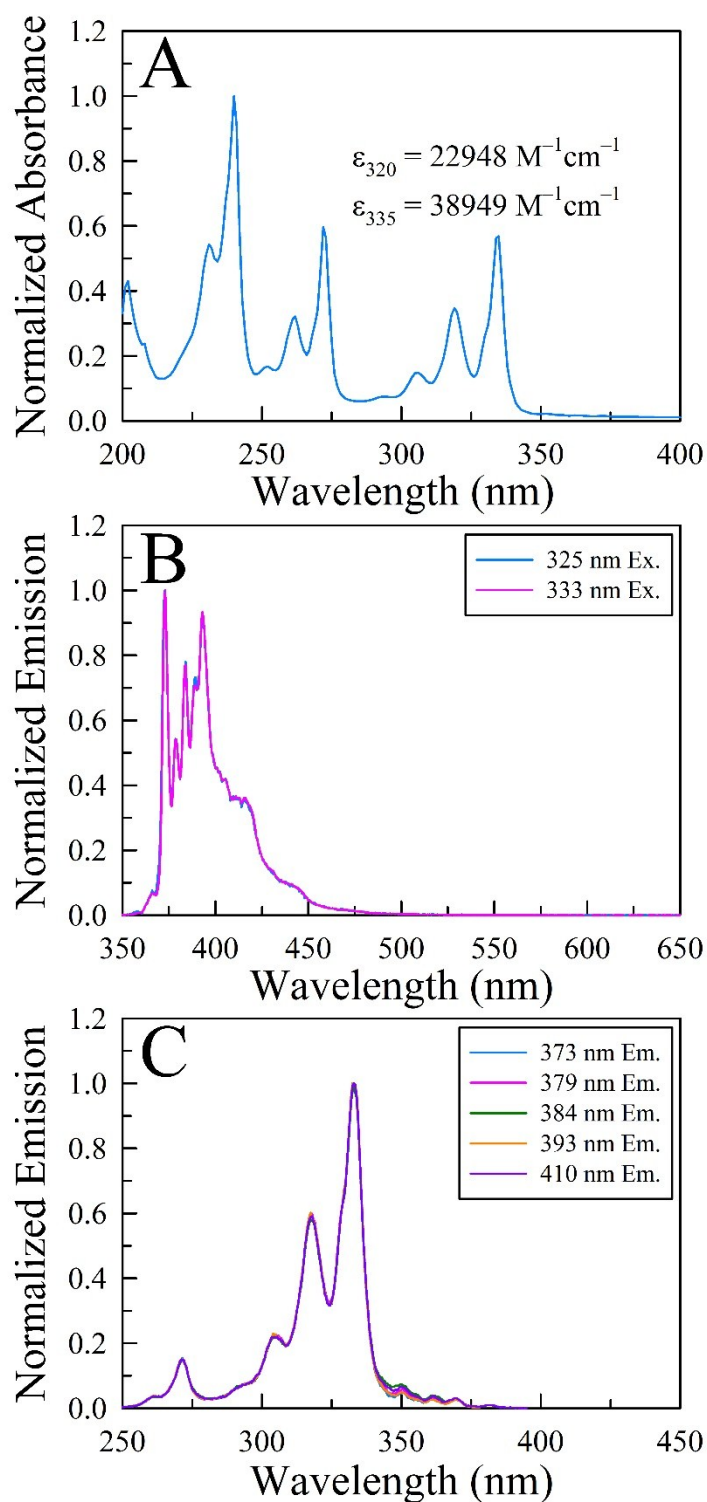

**Figure S2.** Normalized (A) absorbance and steady-state (B) emission and (C) excitation spectra of pyrene (12.5  $\mu\text{M}$ ) dissolved in methanol, monitored at the wavelengths indicated within the legends of (B) and (C). The emission and excitation spectra were normalized to the highest energy emission peak.

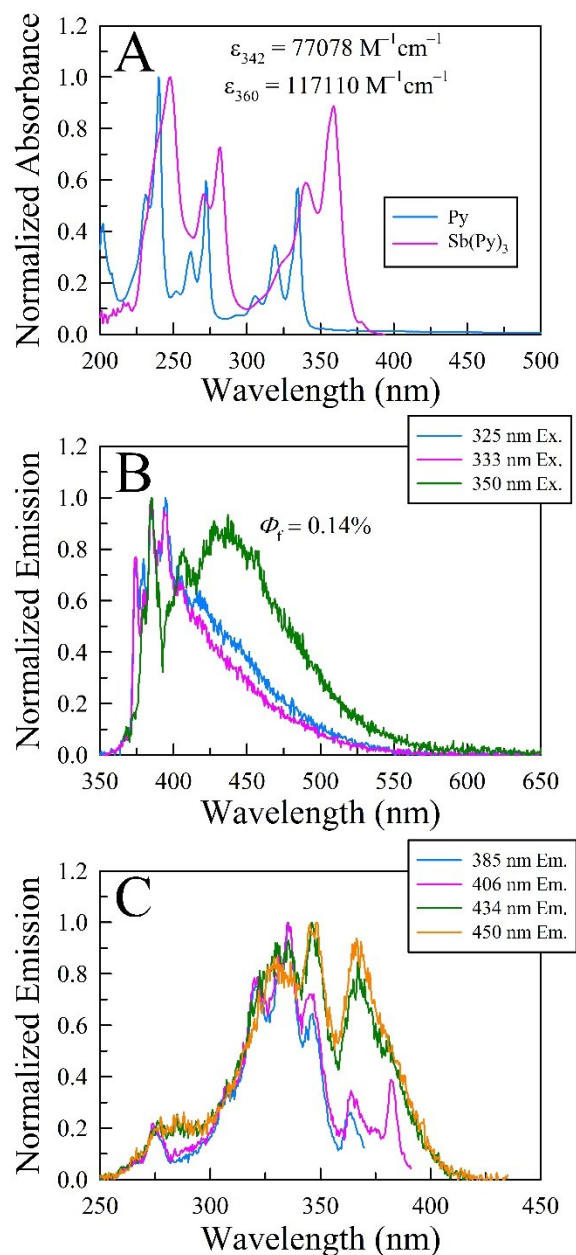

**Figure S3.** Normalized (A) absorbance and steady-state (B) emission and (C) excitation spectra of  $\text{Sb(Py)}_3$  ( $10.9 \mu\text{M}$ ) dissolved in DCM. The absorbance of free pyrene ( $12.5 \mu\text{M}$  in MeOH) is also provided in panel A as a benchmark. The emission and excitation spectra were monitored at the wavelengths indicated within the legends of (B) and (C), normalizing to the highest energy emission peak. The quantum yield, calculated at 350 nm excitation, was found to be 0.14%.

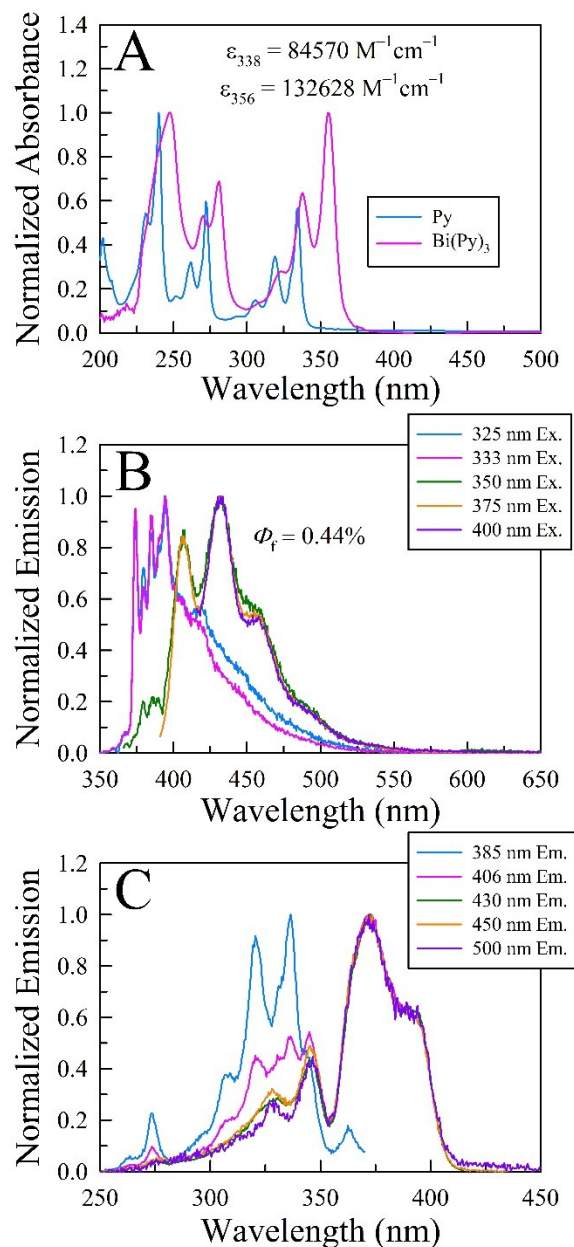

**Figure S4.** Normalized (A) absorbance and steady-state (B) emission and (C) excitation spectra of  $\text{Bi(Py)}_3$  ( $10.9 \mu\text{M}$ ) dissolved in DCM. The absorbance of free pyrene ( $12.5 \mu\text{M}$  in MeOH) is also provided in panel A as a benchmark. The emission and excitation spectra were monitored at the wavelengths indicated within the legends of (B) and (C), normalizing to the highest energy emission peak. The quantum yield, calculated at 350 nm excitation, was found to be 0.44%.



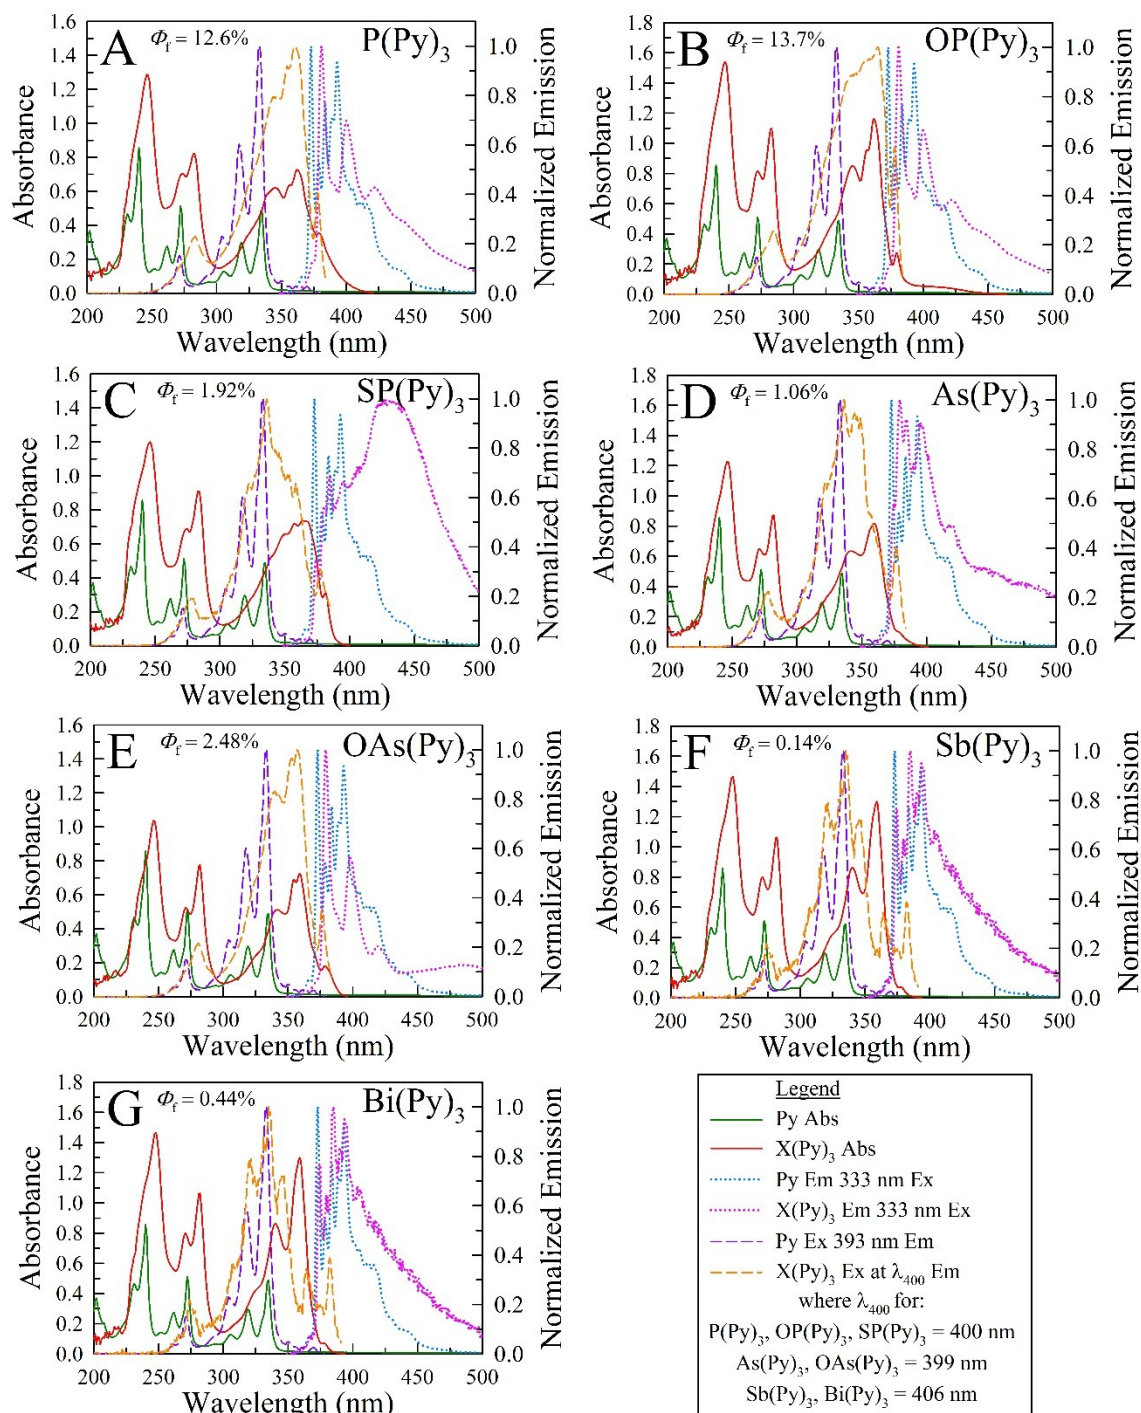

**Figure S5.** Absorbance (left y-axis) and normalized steady-state emission and excitation (right y-axis) spectra of (A)  $\text{P(Py)}_3$ , (B)  $\text{OP(Py)}_3$ , (C)  $\text{SP(Py)}_3$ , (D)  $\text{As(Py)}_3$ , (E)  $\text{OAs(Py)}_3$ , (F)  $\text{Sb(Py)}_3$ , and (G)  $\text{Bi(Py)}_3$  compared to the spectra of pyrene. All emission spectra were monitored under 333 nm excitation while the excitation spectra were monitored at the emission band nearest to 400 nm (the exact wavelengths monitored are indicated within the legends). All fluorescence spectra were normalized to the highest energy emission peak. The quantum yields of each compound are indicated within their respective panel.

# P(C<sub>16</sub>H<sub>9</sub>)<sub>3</sub>, 1

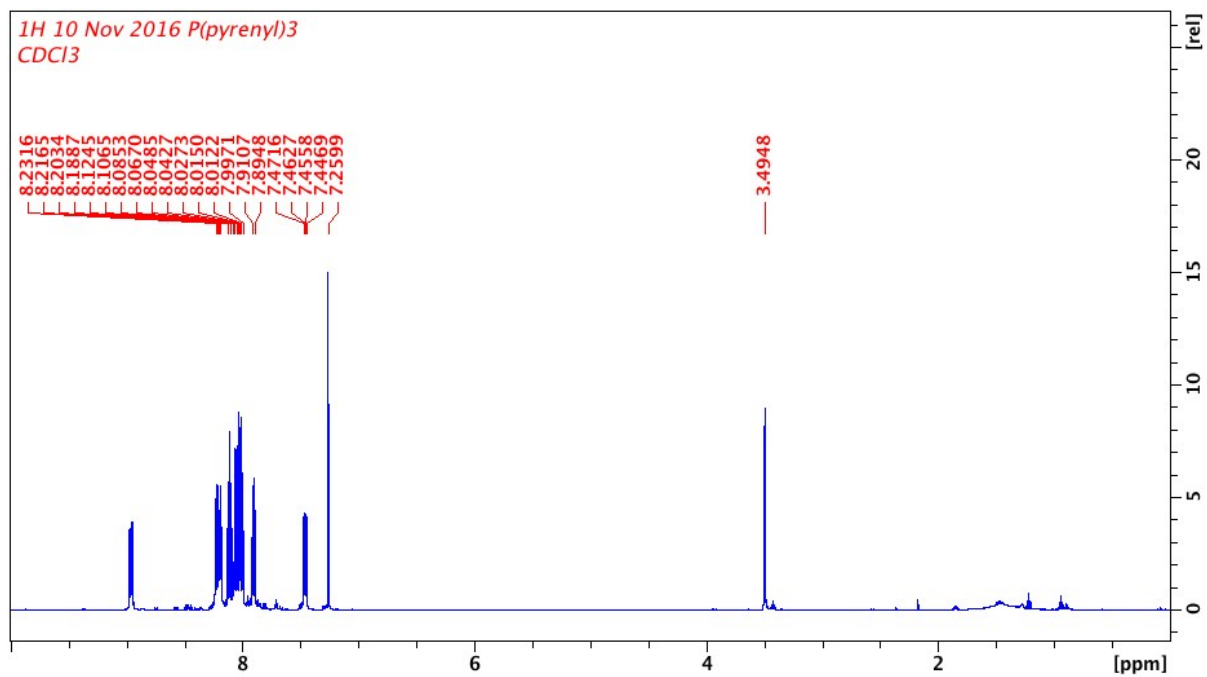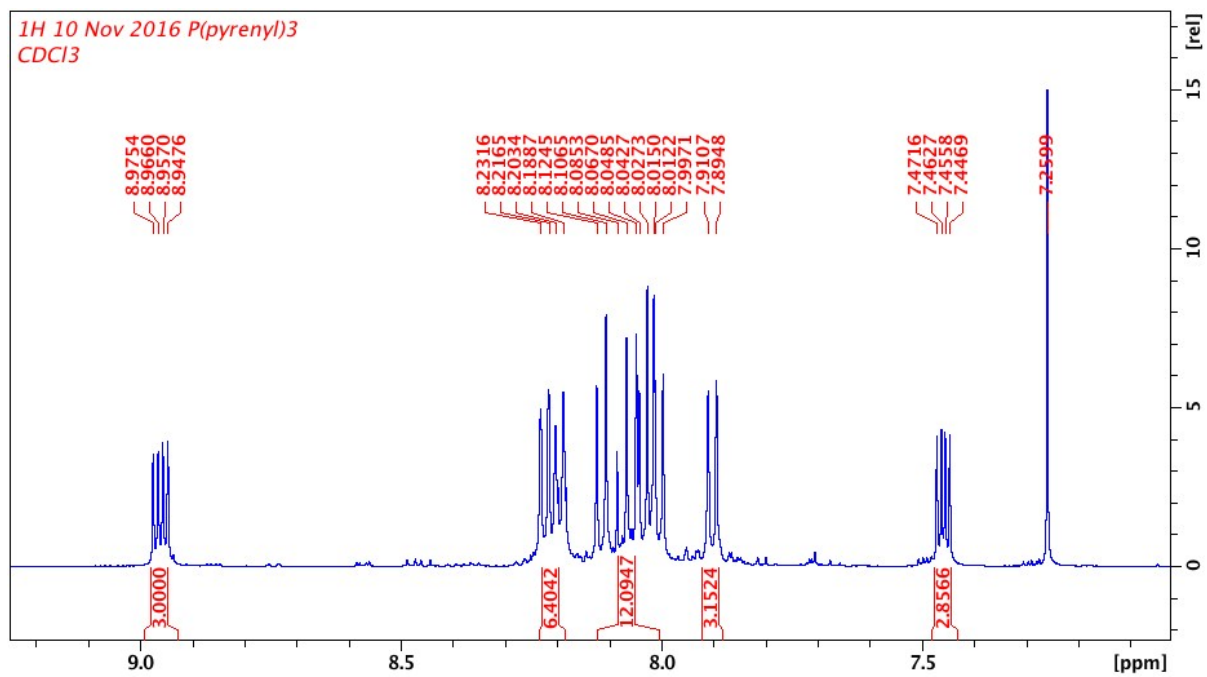



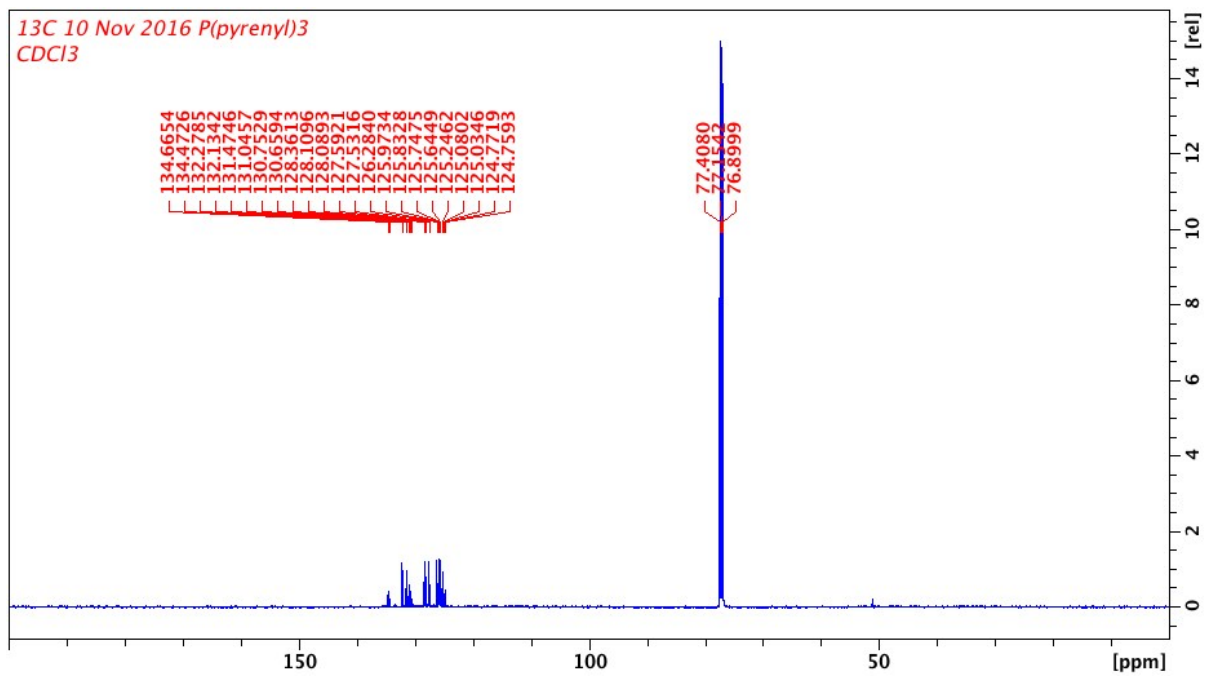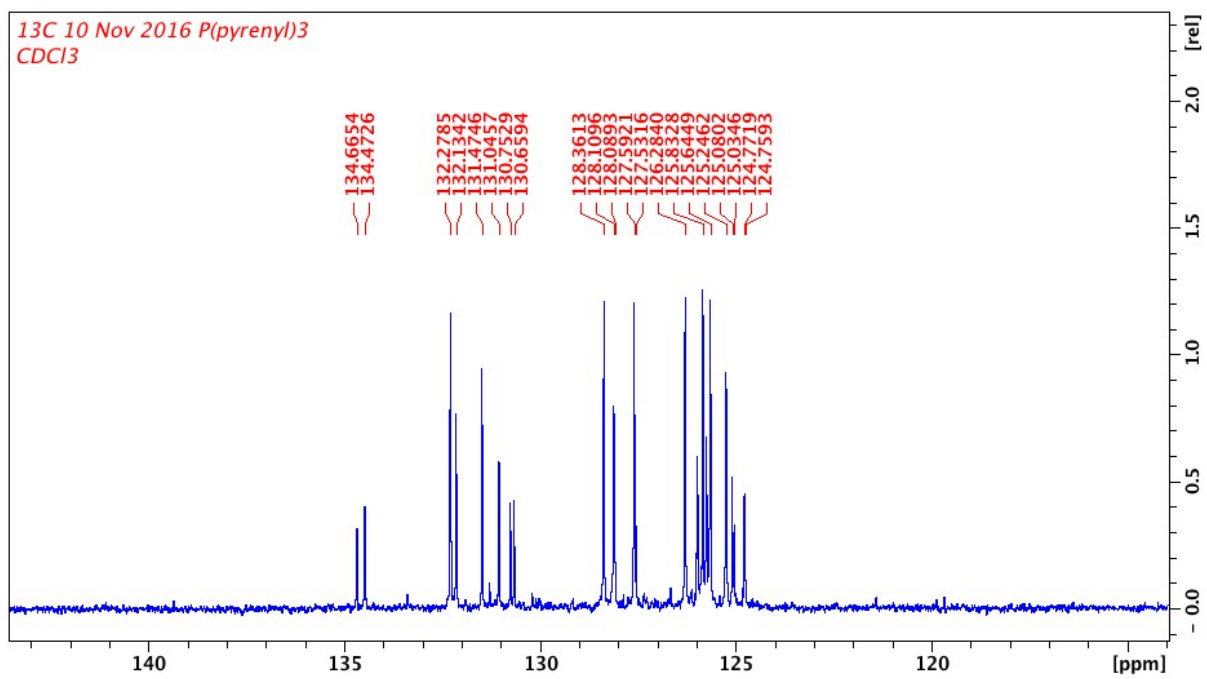

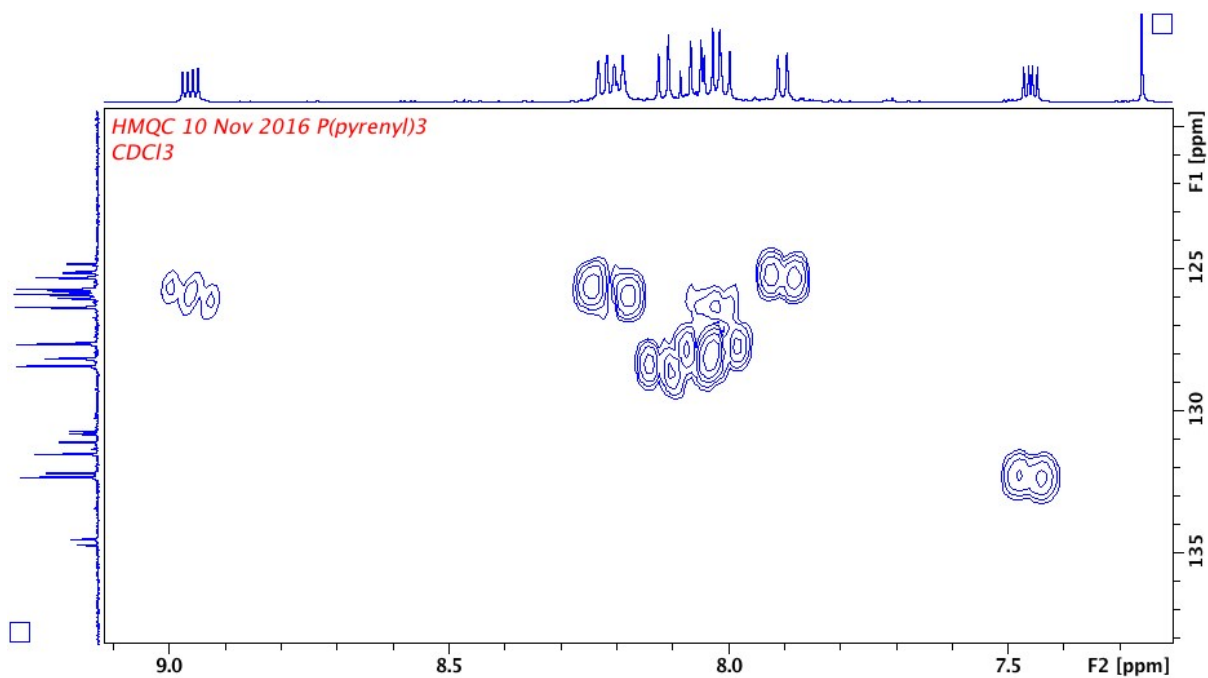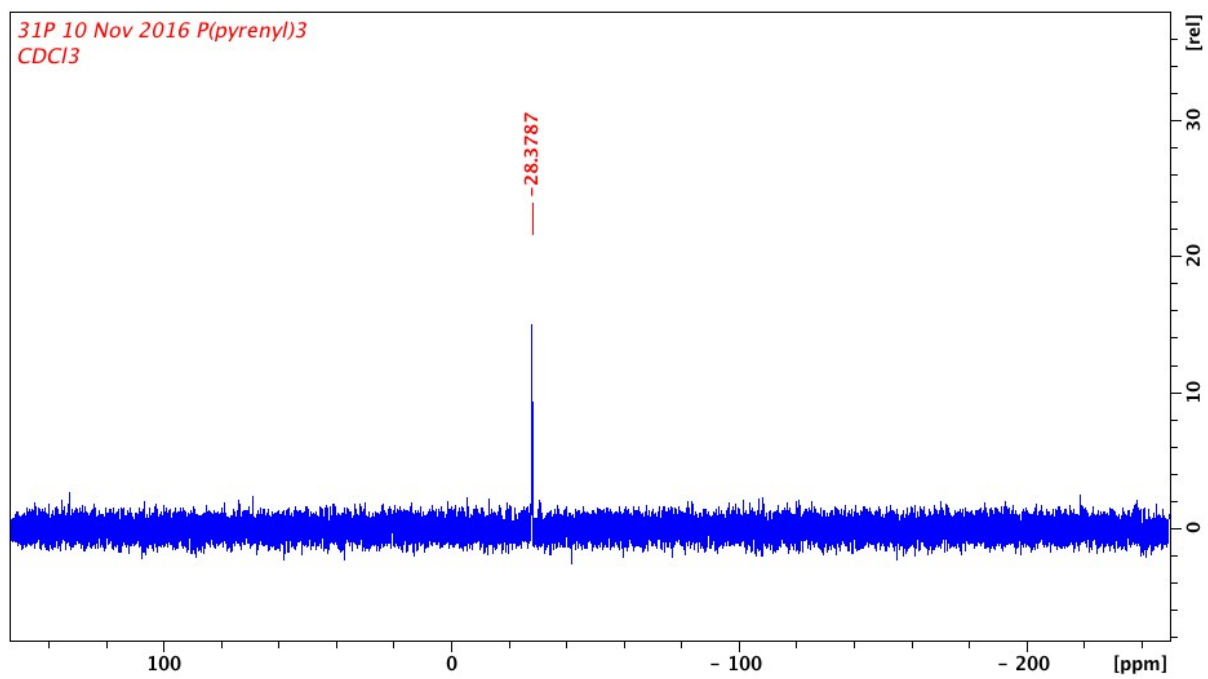

As(C<sub>16</sub>H<sub>9</sub>)<sub>3</sub>, 2

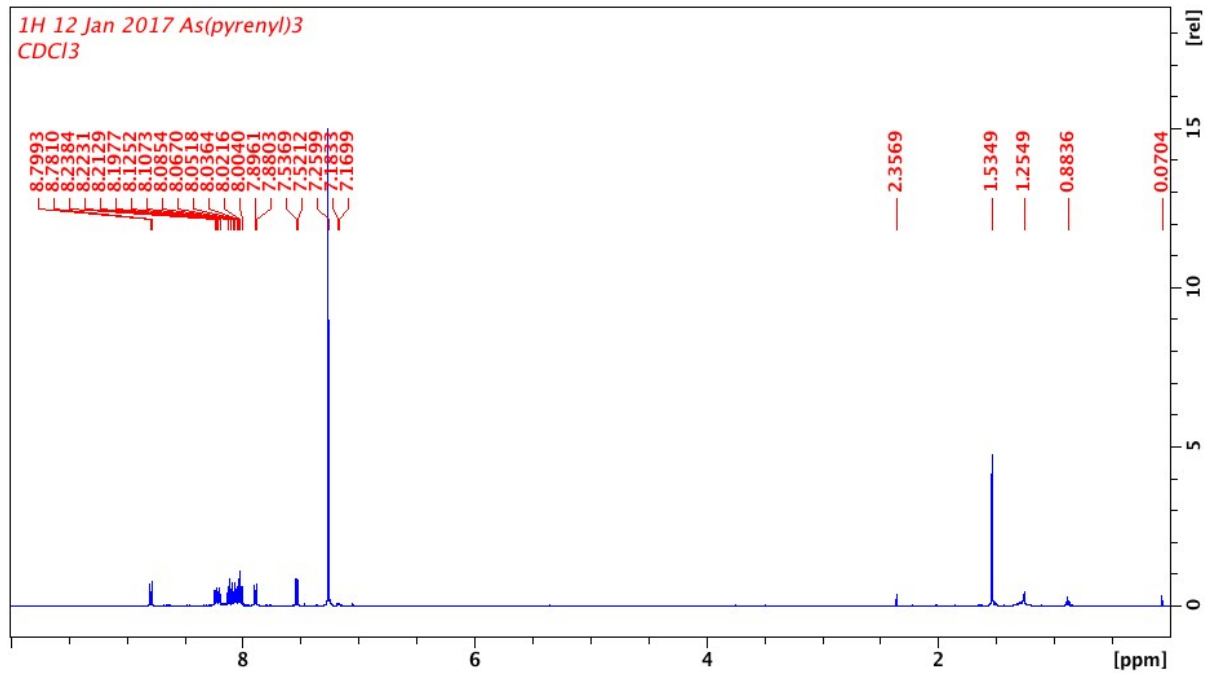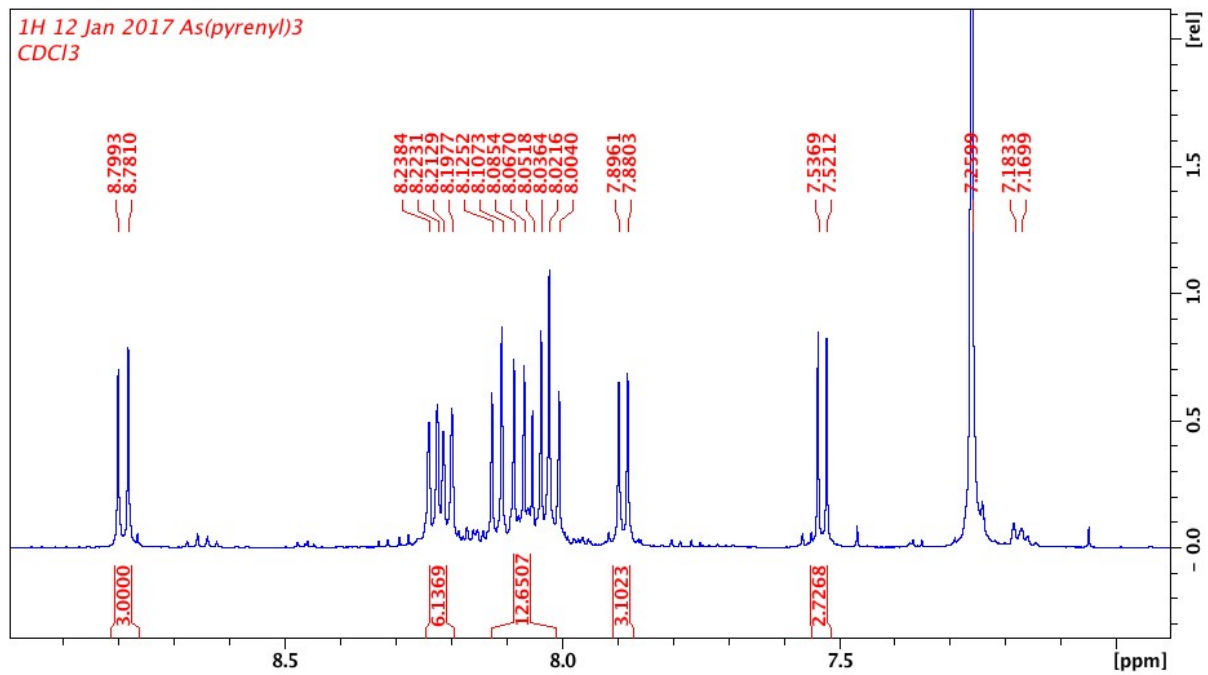

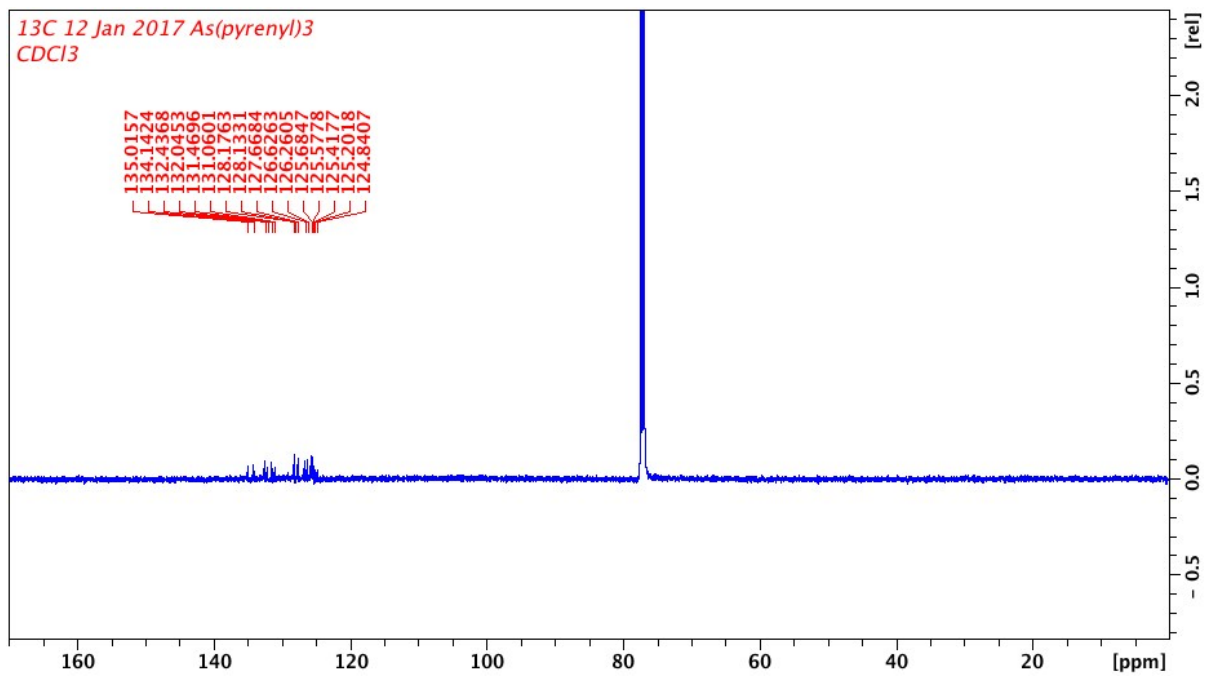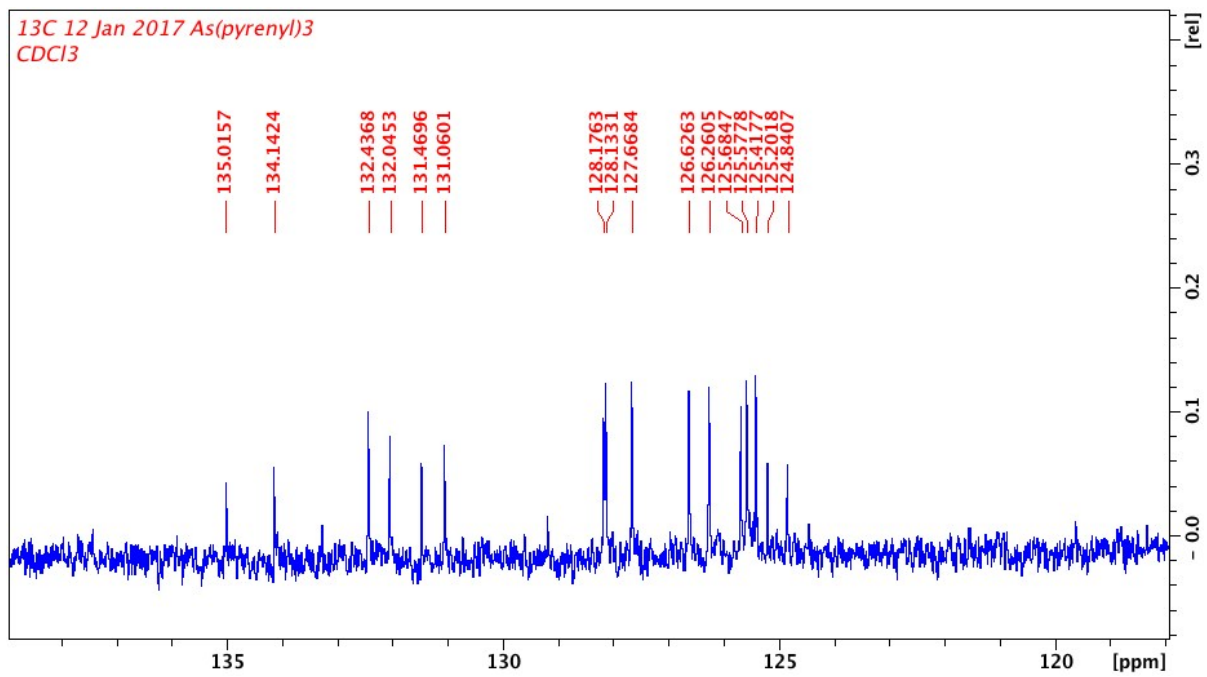

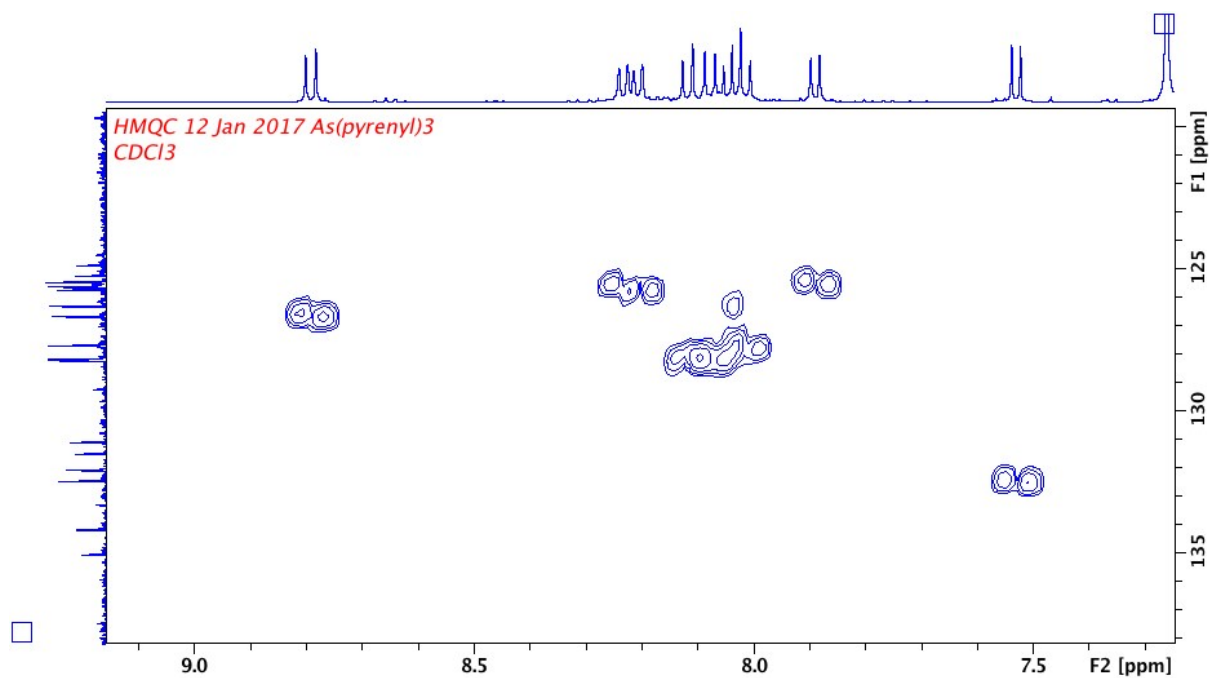

**Sb(C<sub>16</sub>H<sub>9</sub>)<sub>3</sub>, 3**

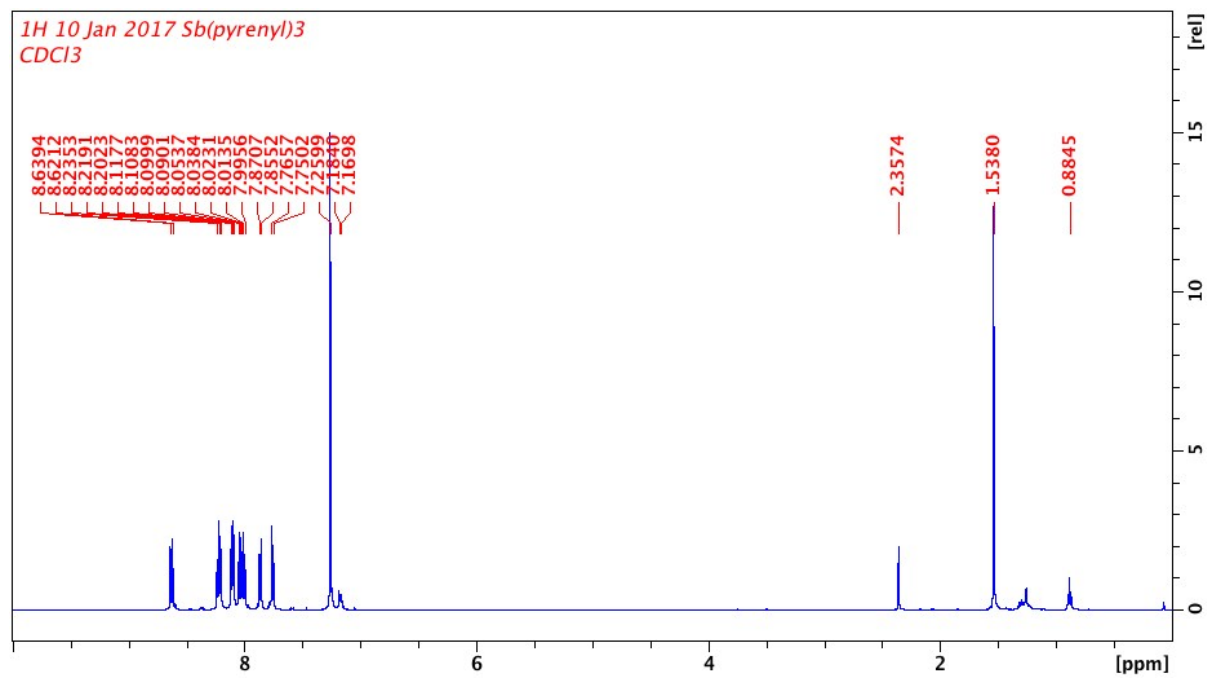

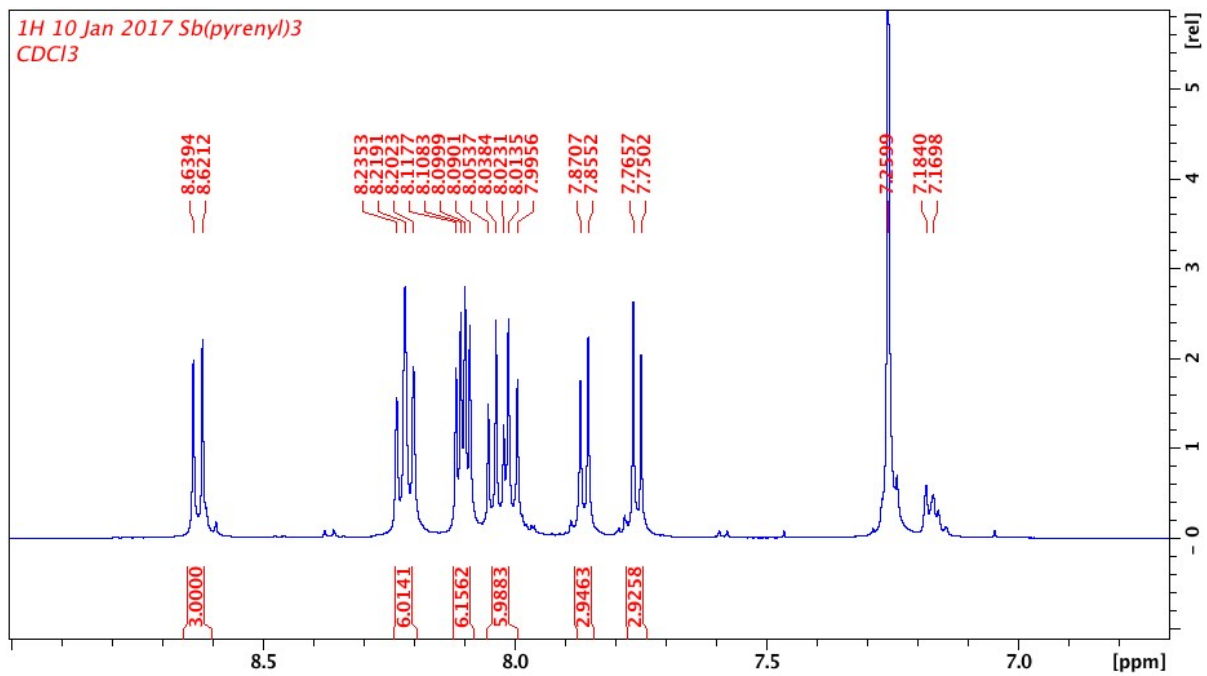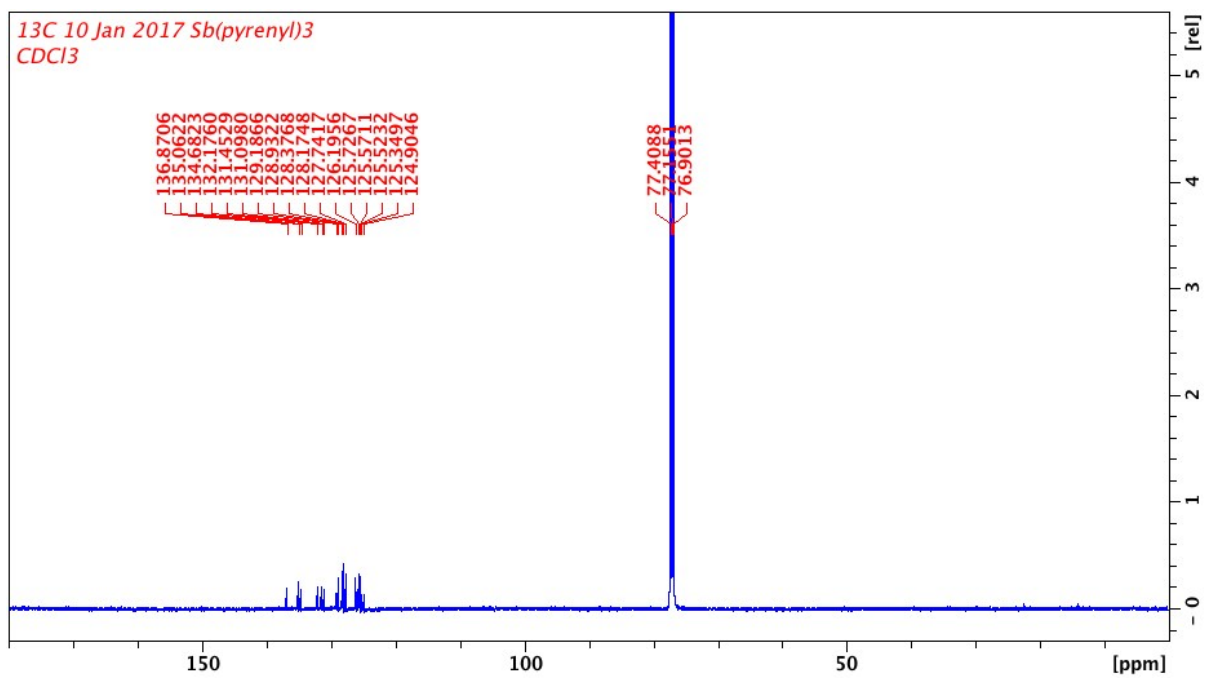



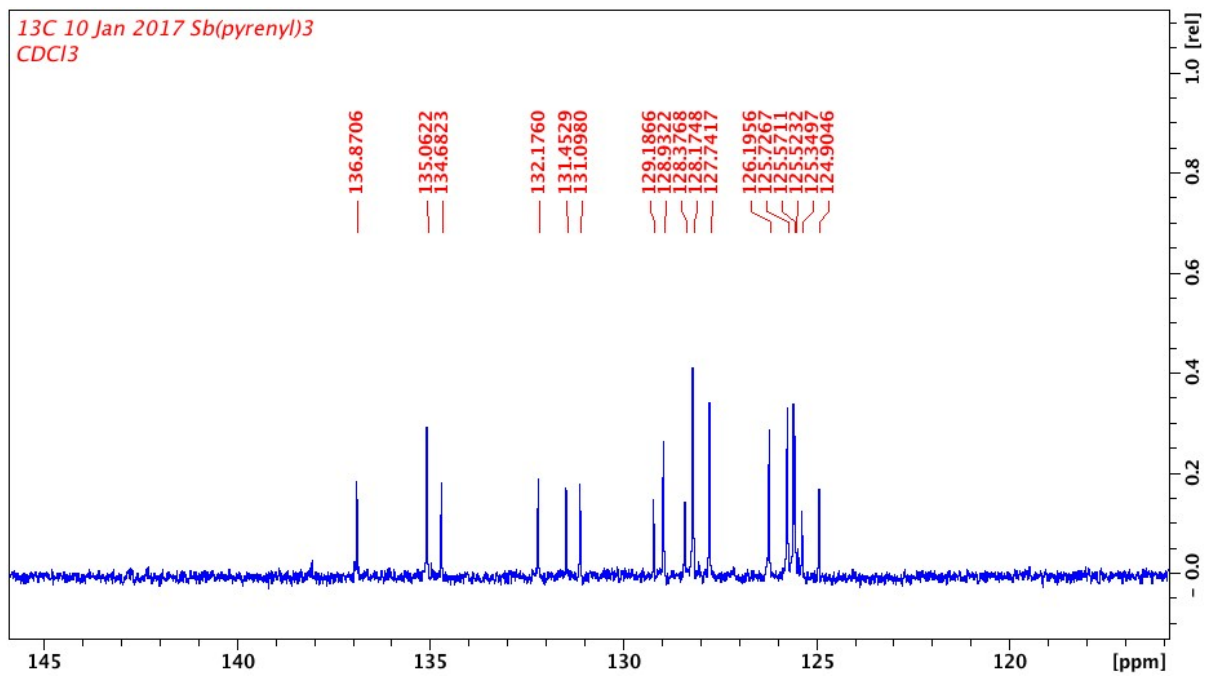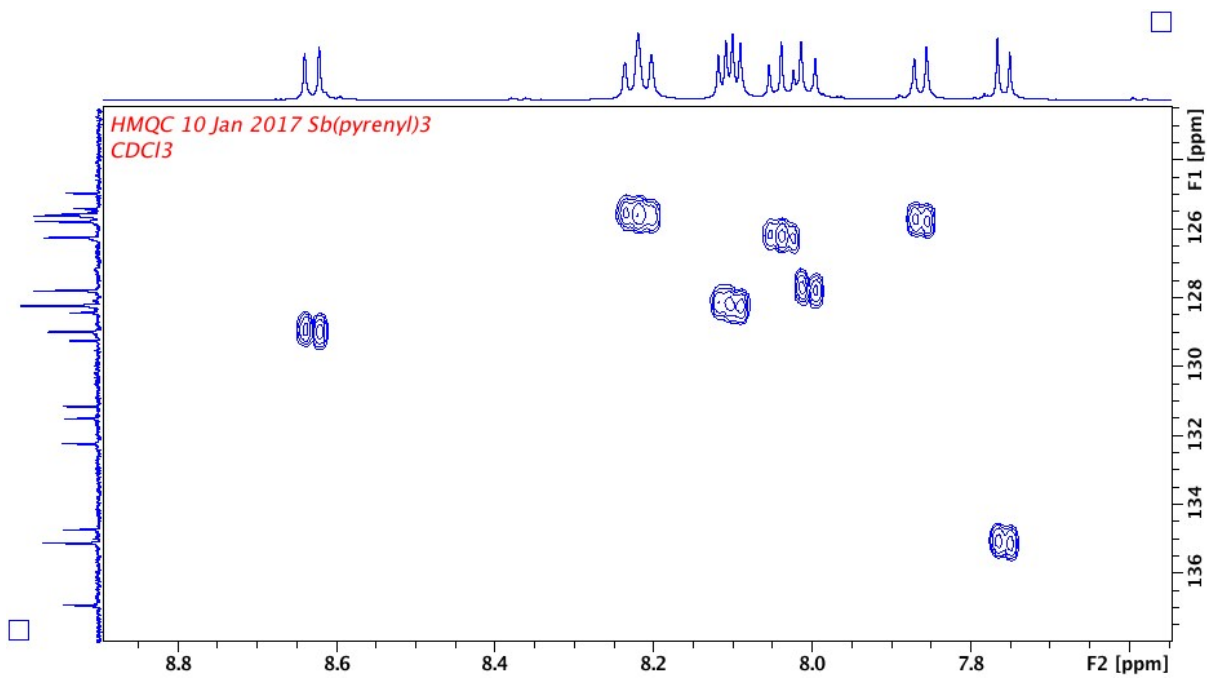

**Bi(C<sub>16</sub>H<sub>9</sub>)<sub>3</sub>, 4**

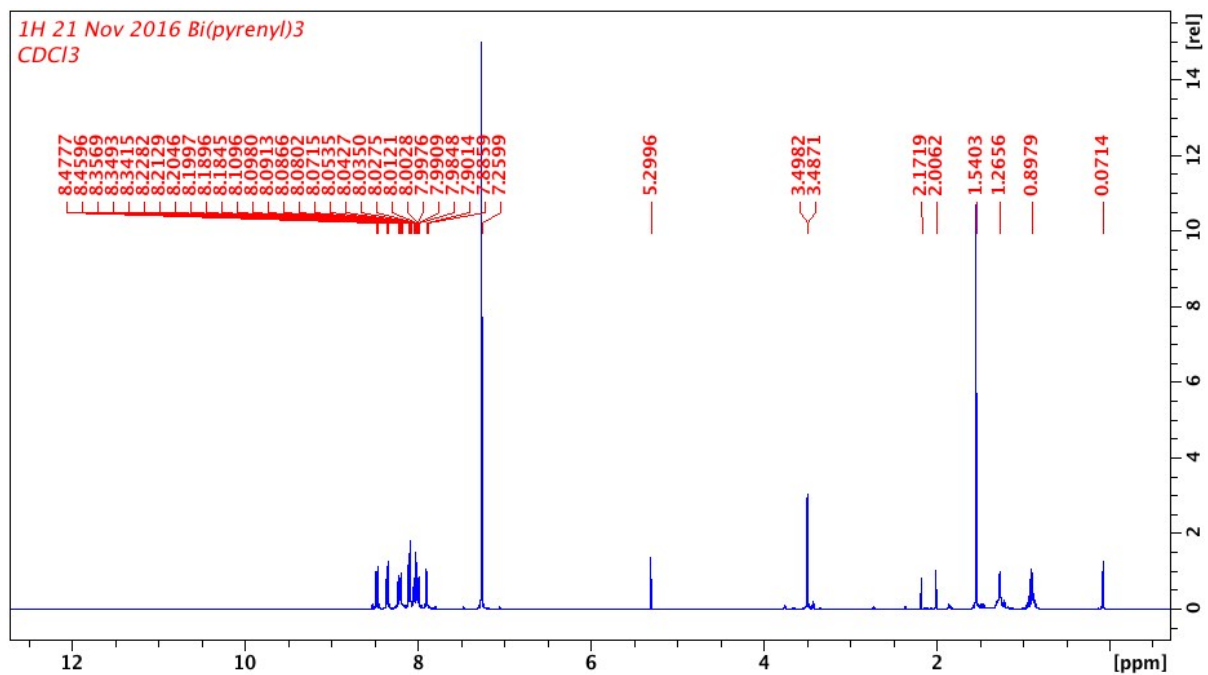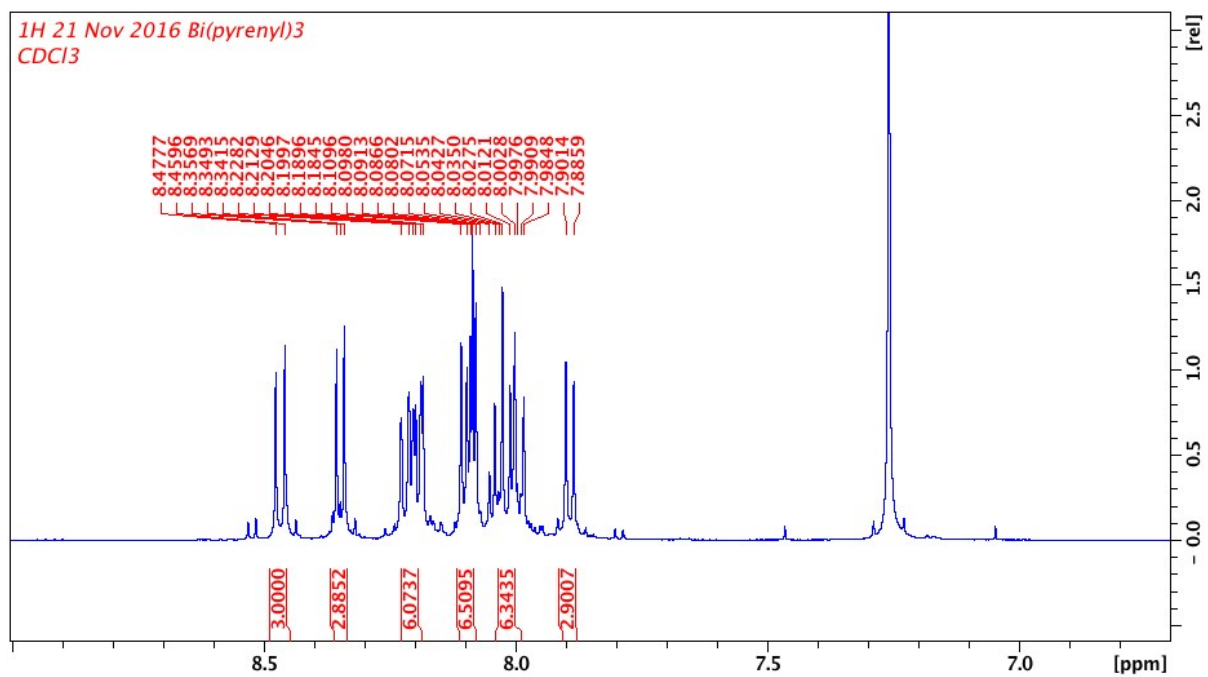

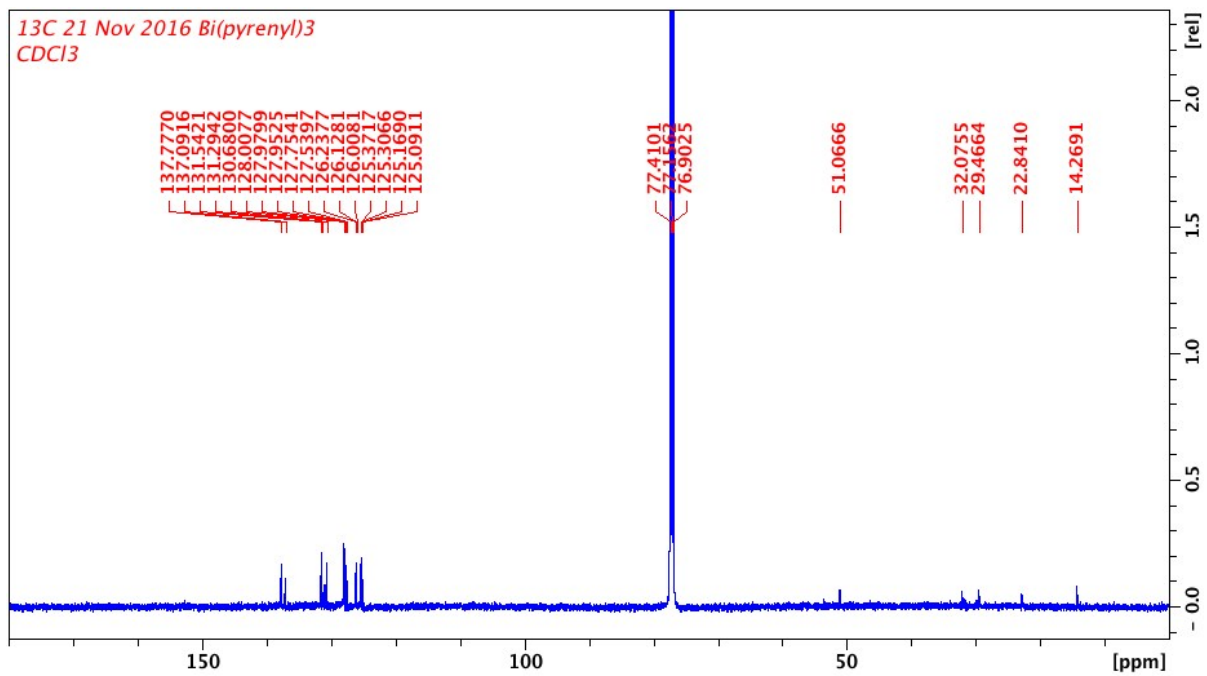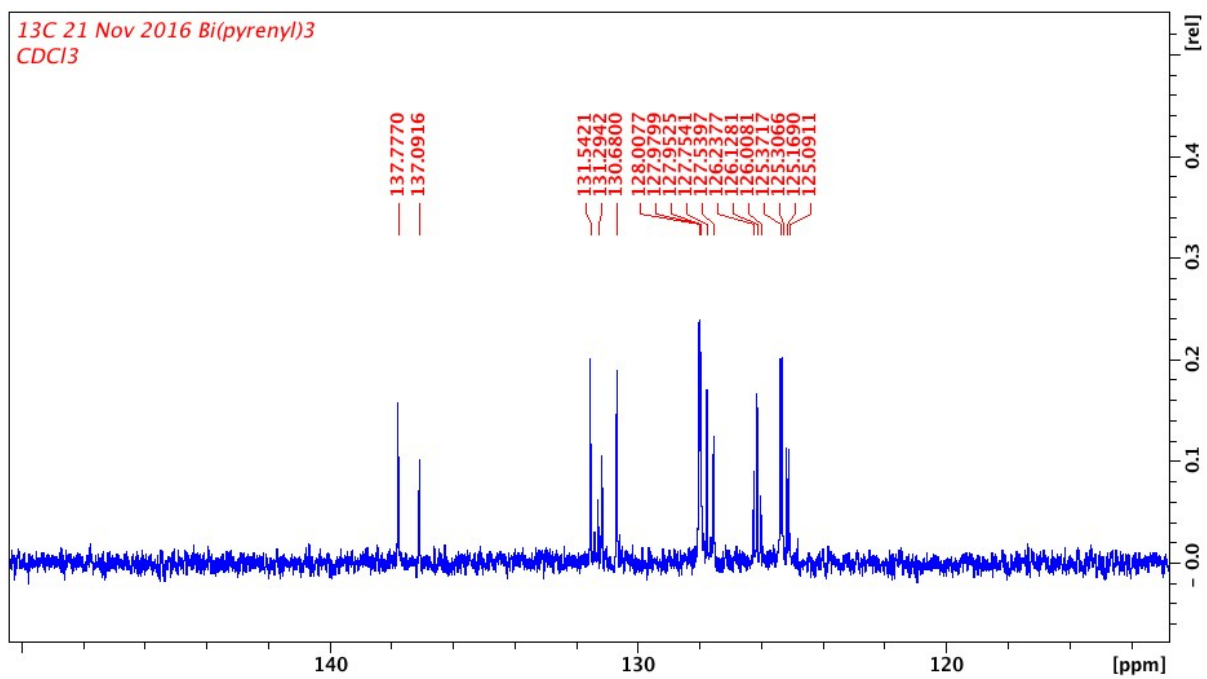

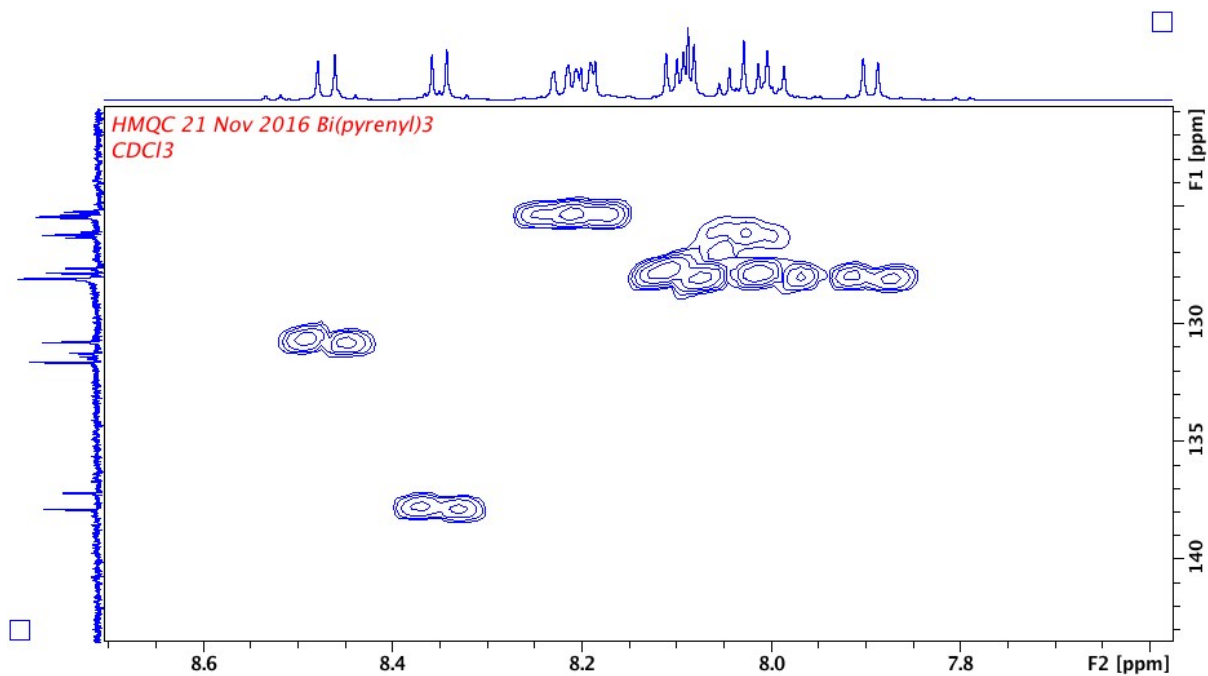

**OP(C<sub>16</sub>H<sub>9</sub>)<sub>3</sub>, 5**

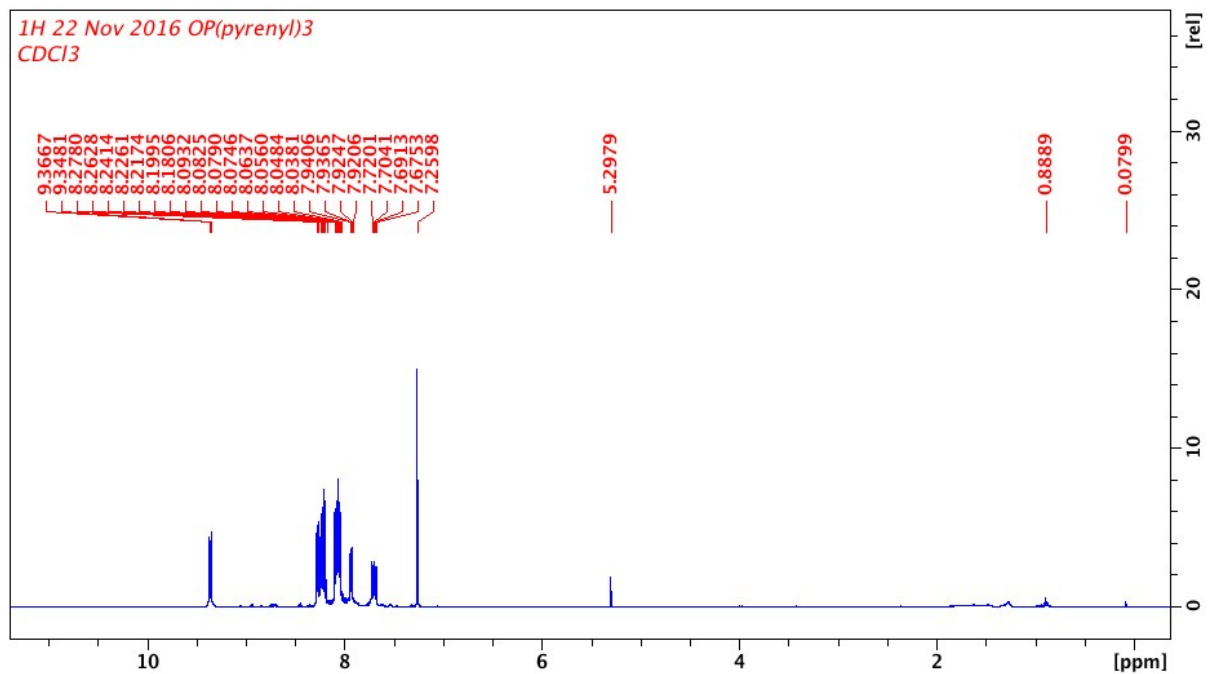

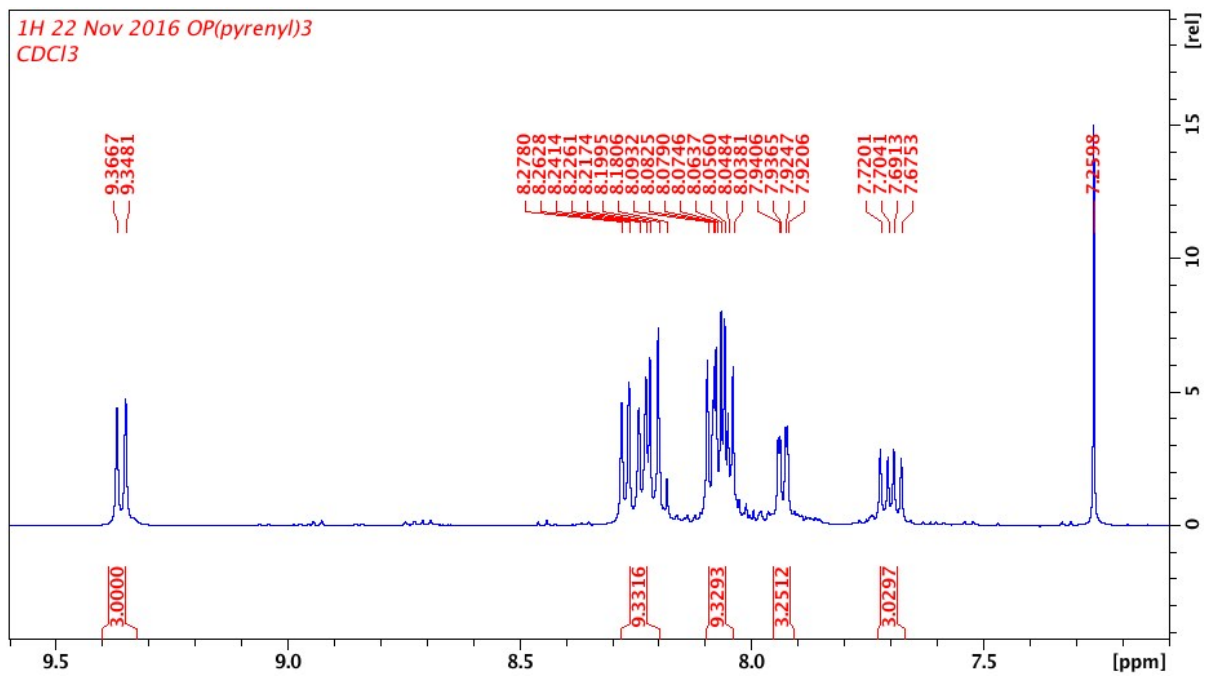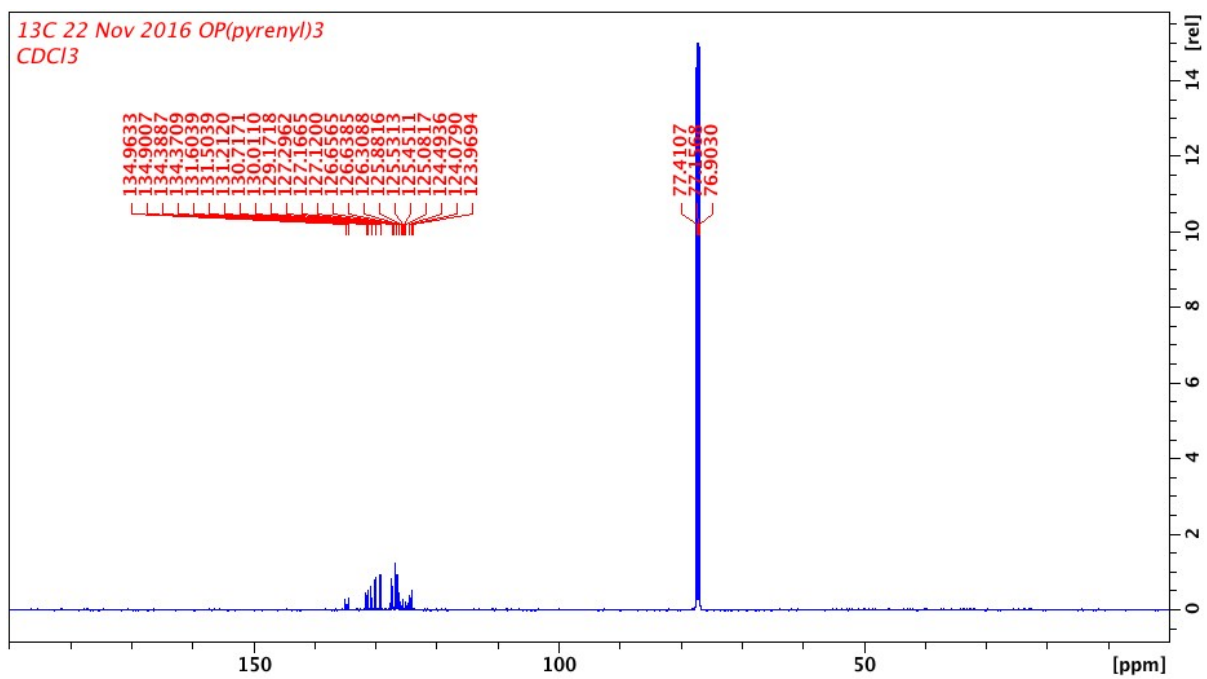

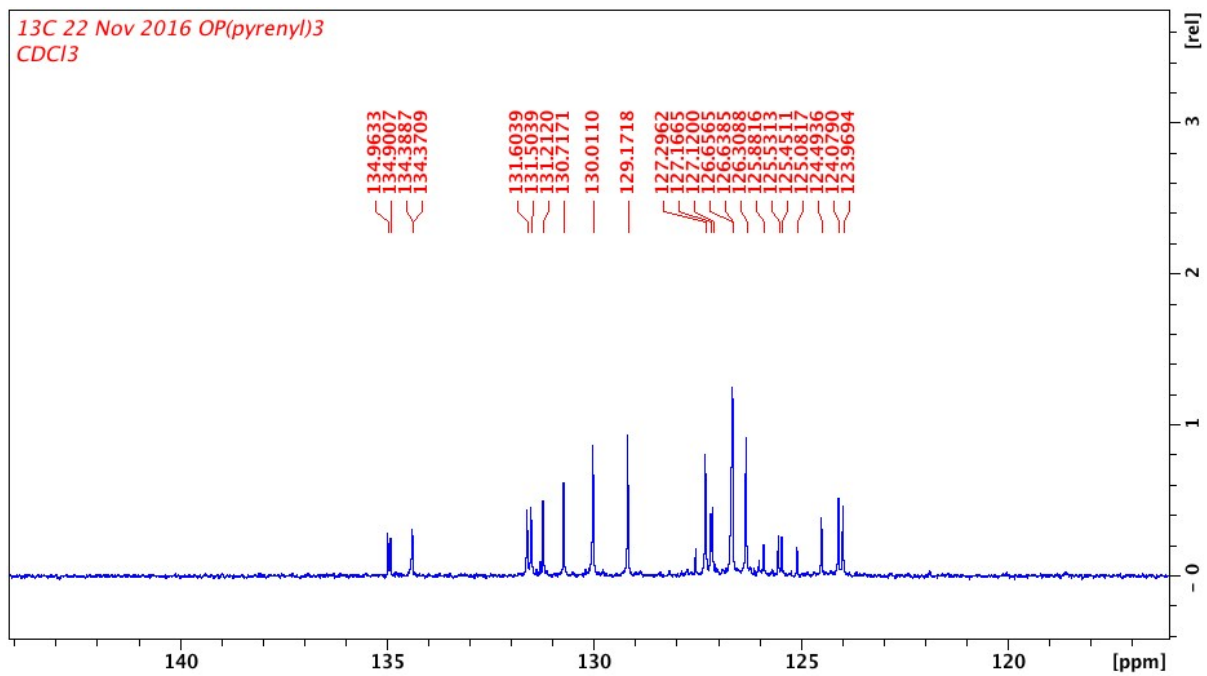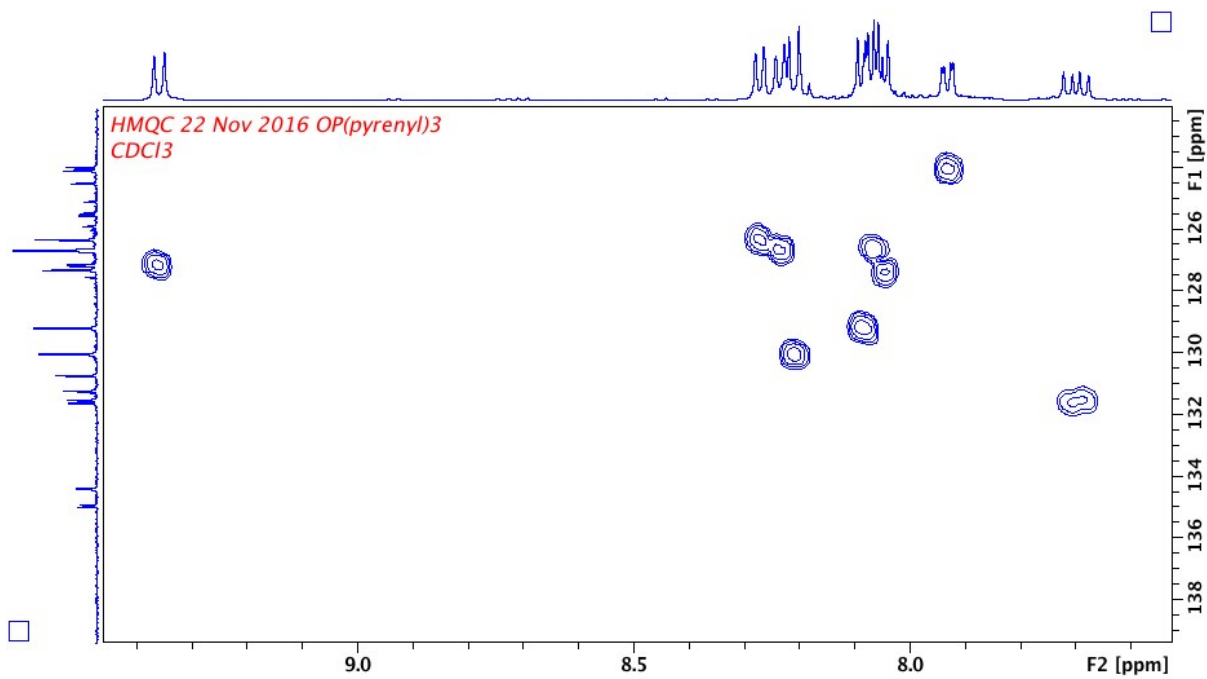



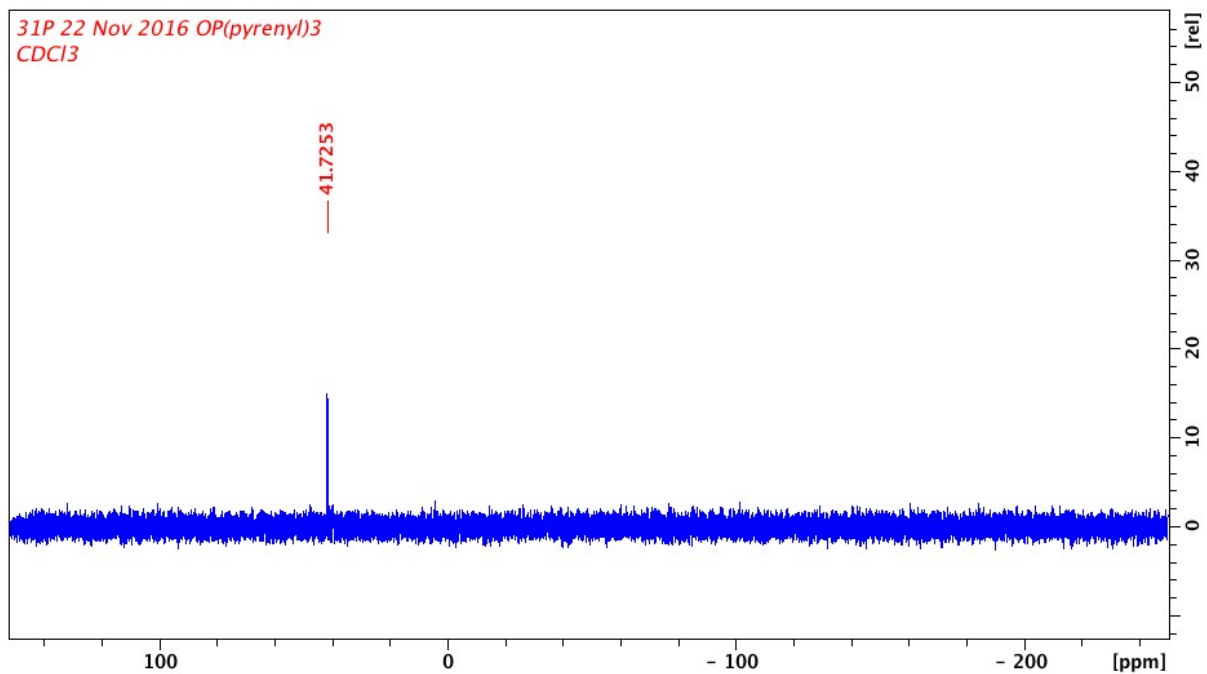

SP(C<sub>16</sub>H<sub>9</sub>)<sub>3</sub>, 6

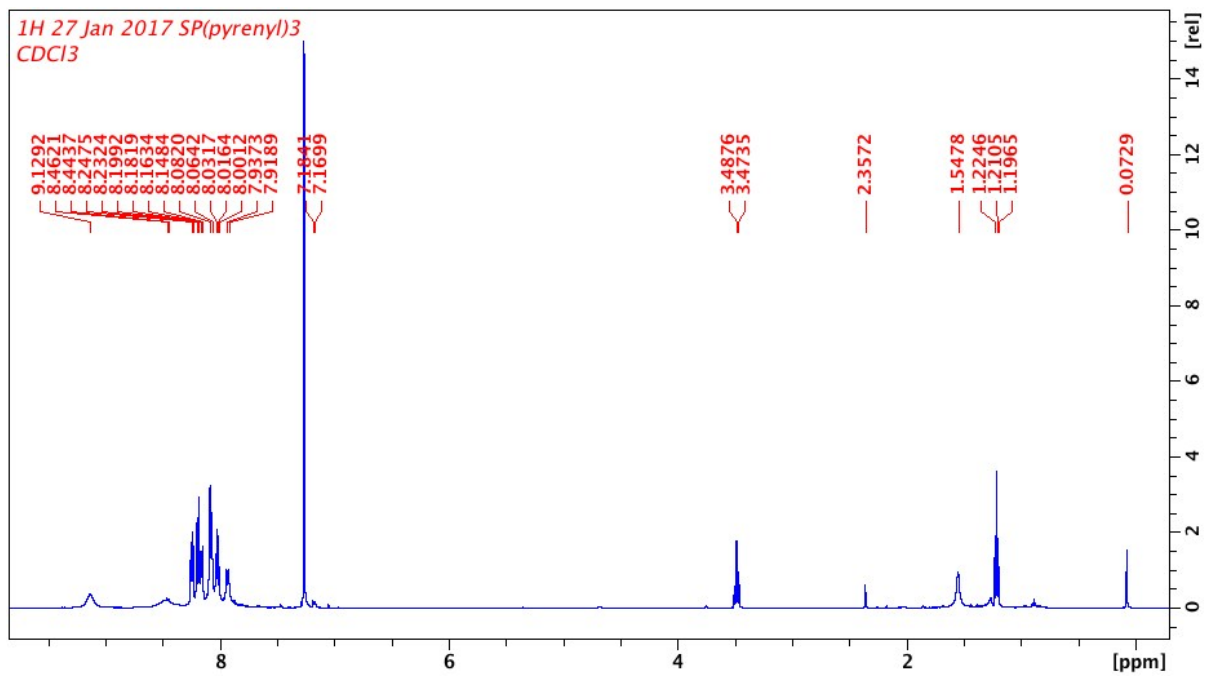

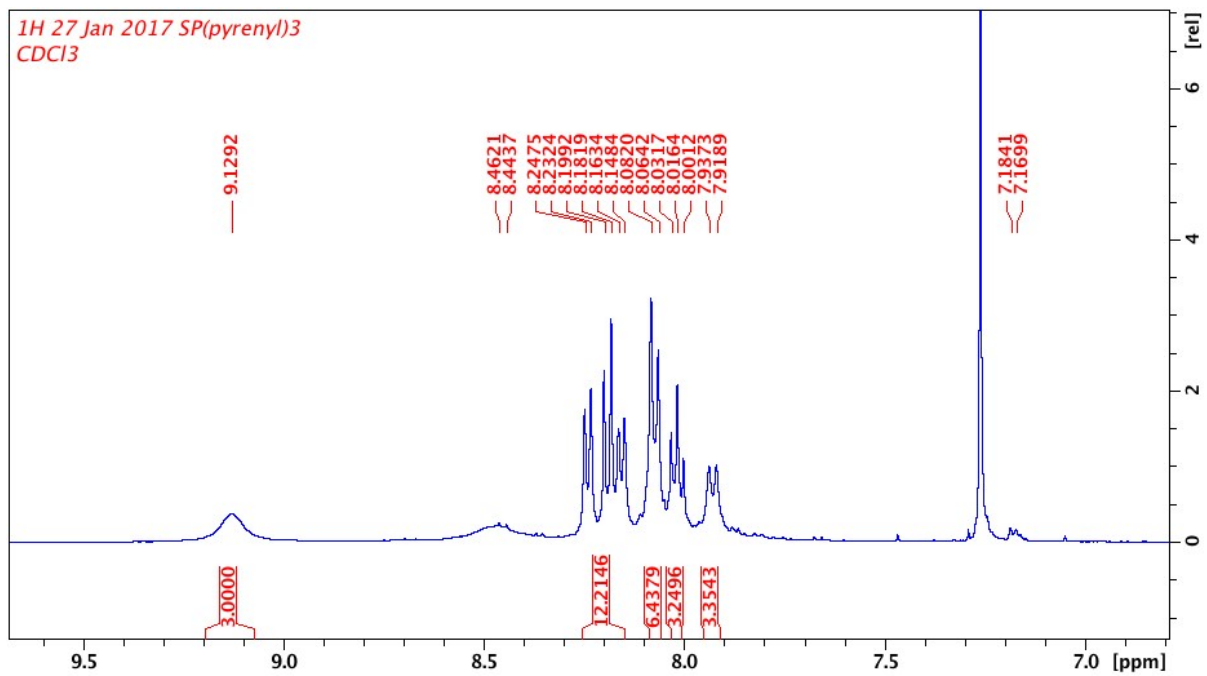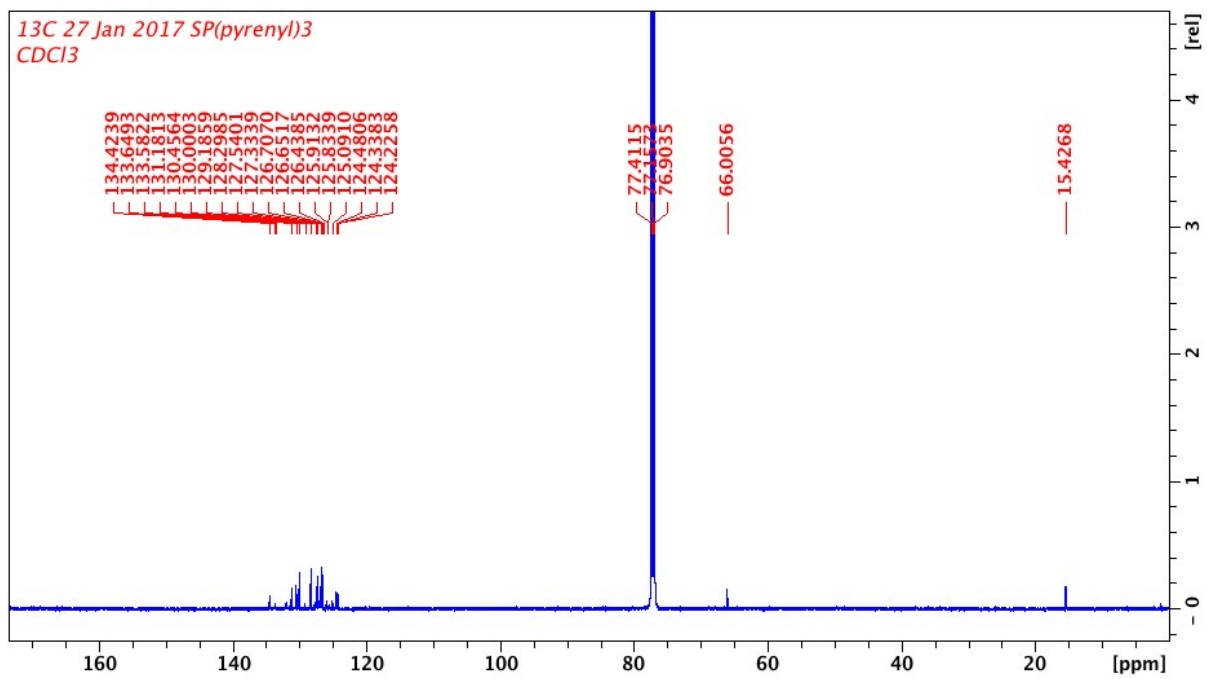

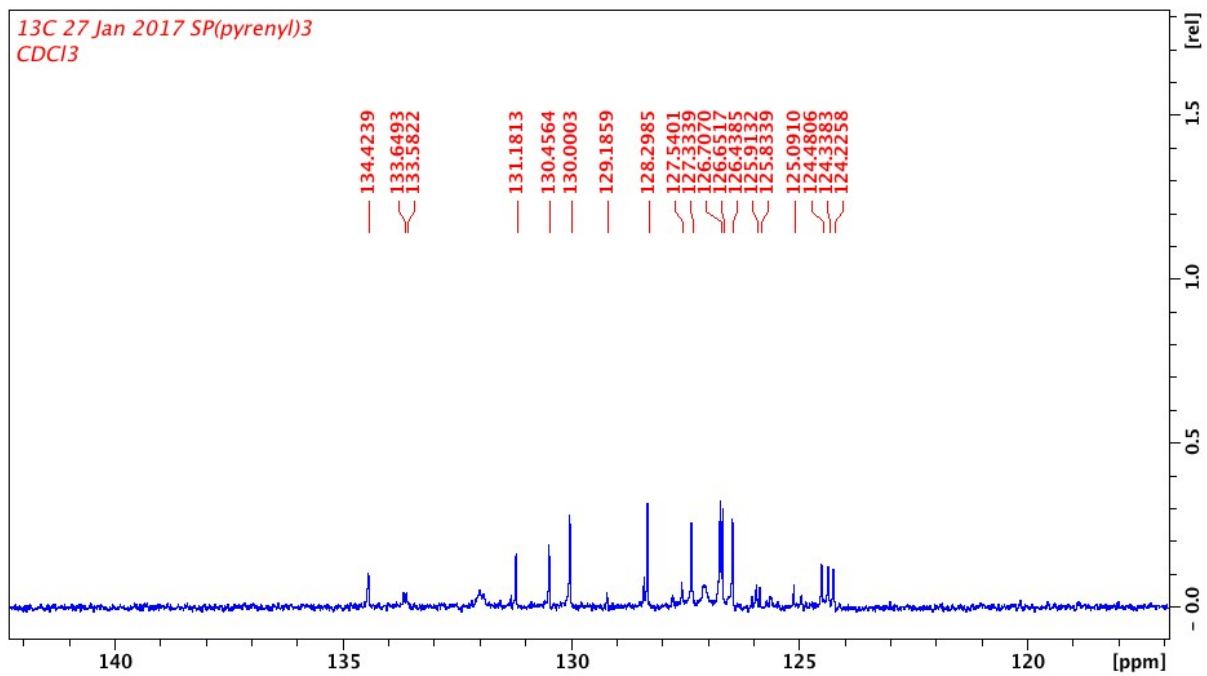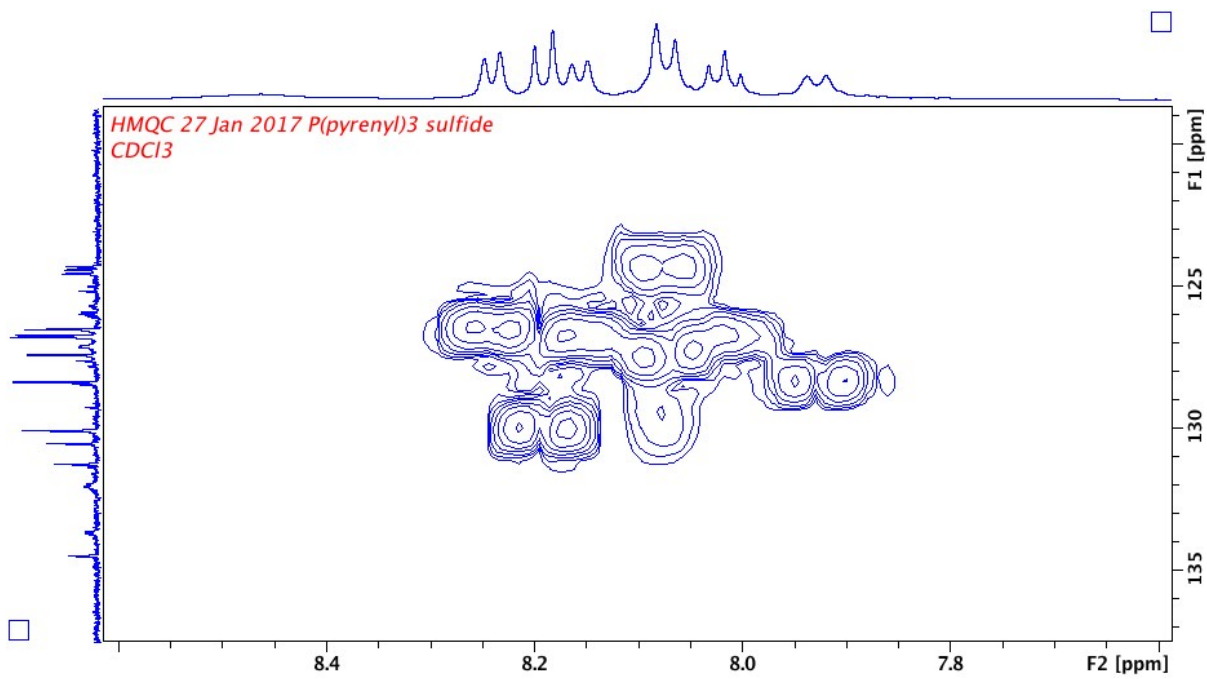

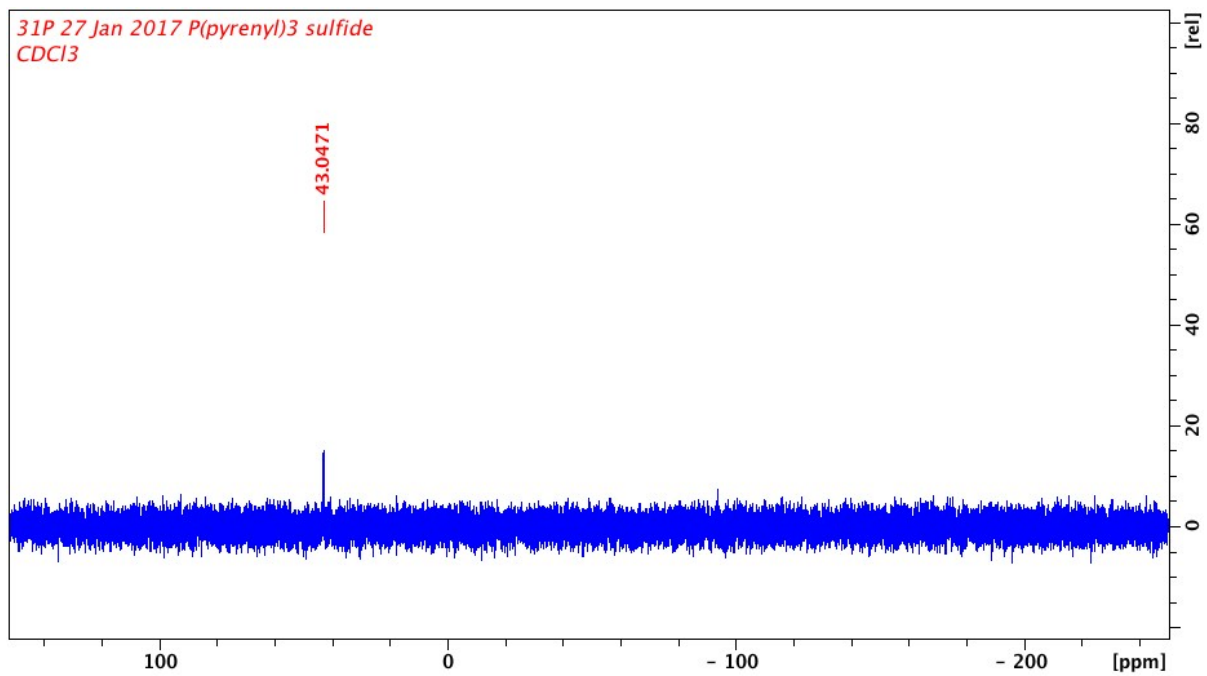

OAs(C<sub>16</sub>H<sub>9</sub>)<sub>3</sub>, 7

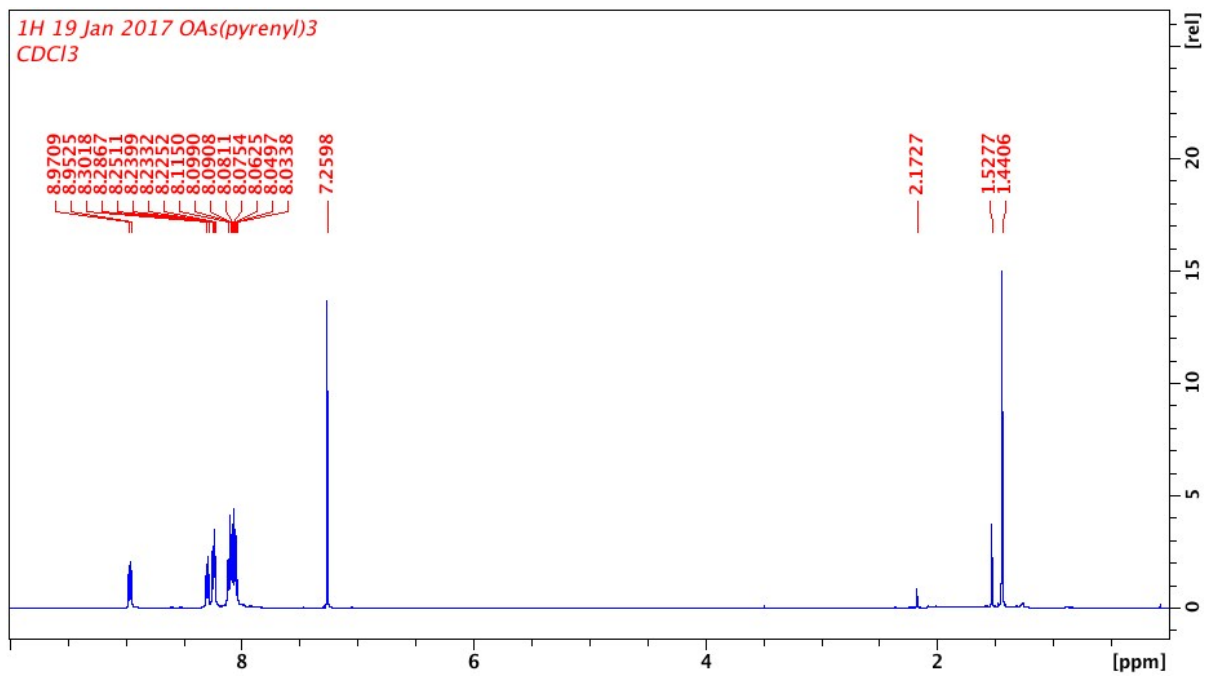

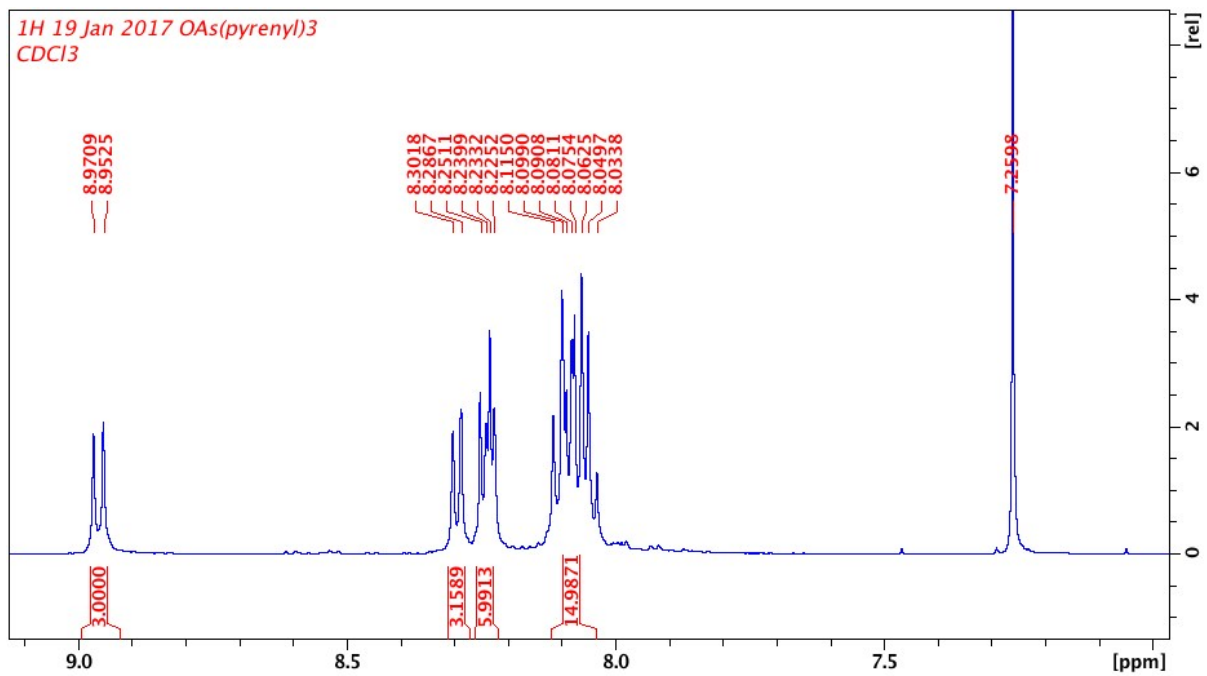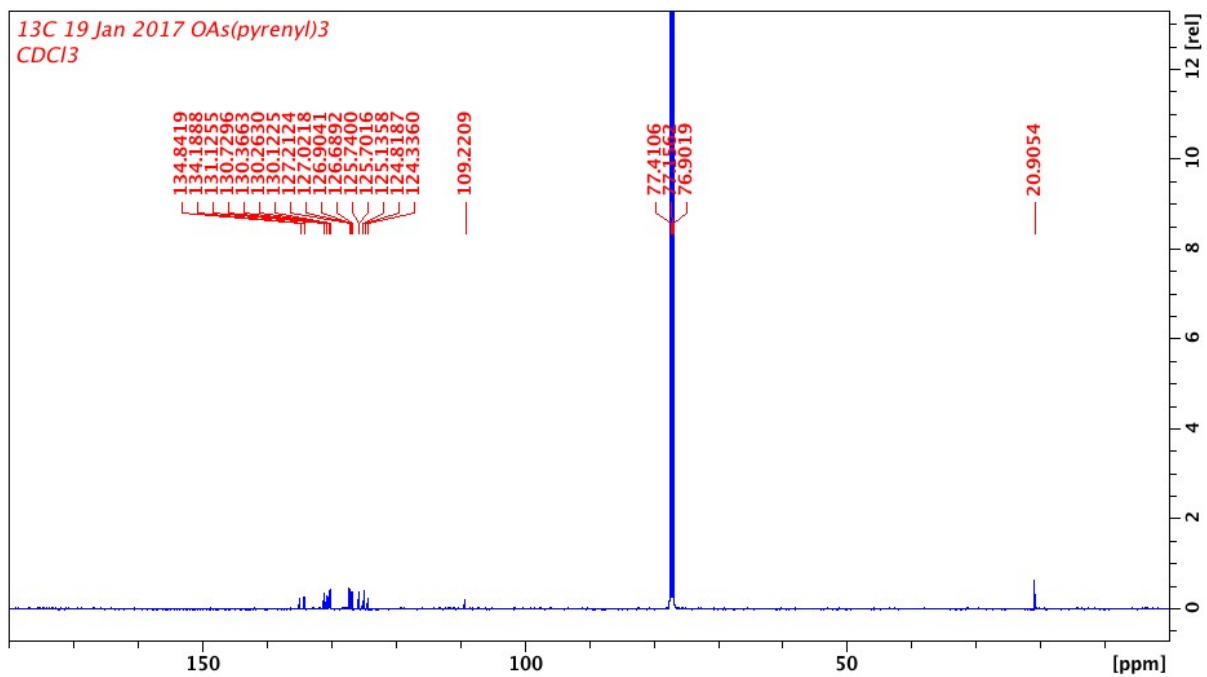

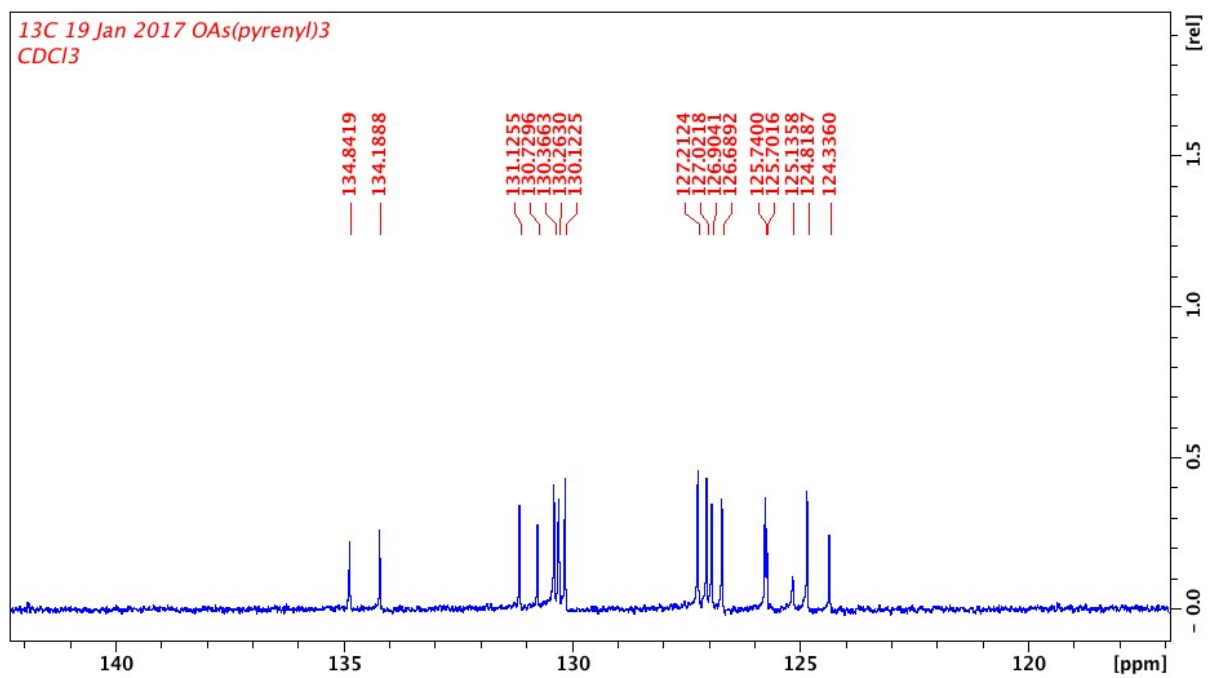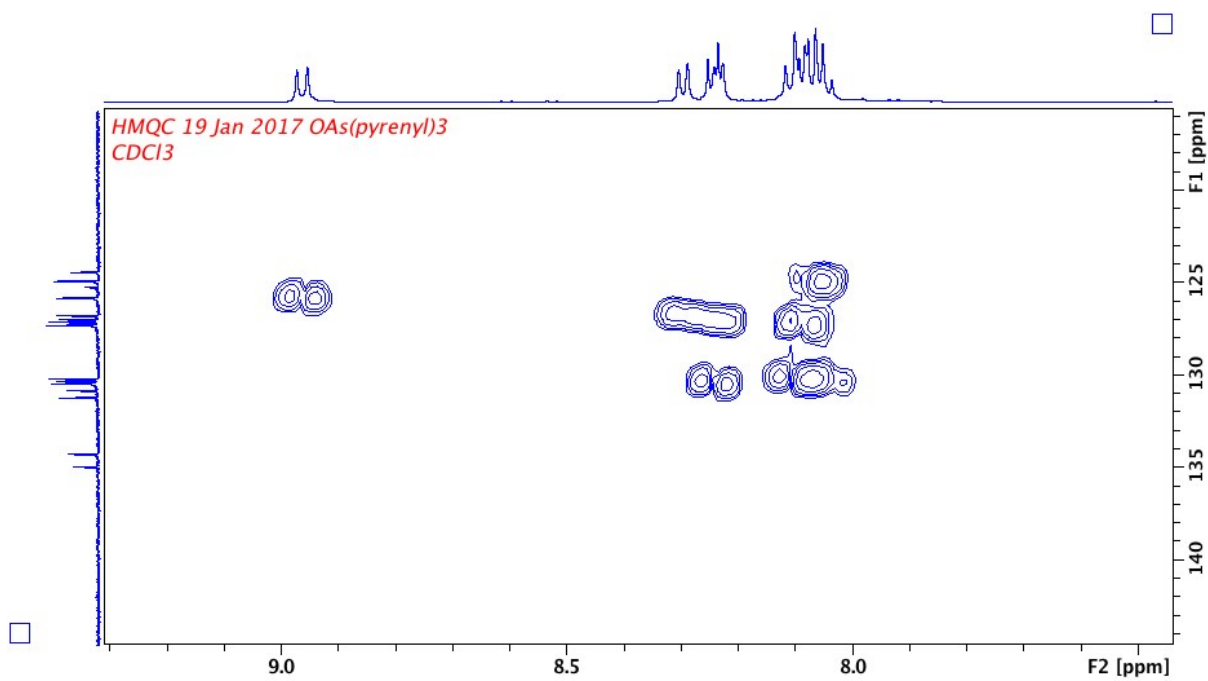

## References

1. Lakowicz, J. R., *Principles of Fluorescence Spectroscopy*. Springer: 2007.
